# Supplementary material for: Immune-related hub genes in intrauterine adhesions: a bioinformatics approach
Source: PeerJ journal article supplement (doi:10.7717/peerj.20035), 2025-10-03
Supplement: Biological_Information_Original_Data.zip [file immune infiltration.xlsx]

## Sheet: 微生信示例 t011输出
cibersort results Column A: samplename Column B-W: 22 types of cells Column X-Z: statistical results. Reference: Newman AM, Liu CL, Green MR, Gentles AJ, Feng W, Xu Y, Hoang CD, Diehn M, Alizadeh AA. Robust enumeration of cell subsets from tissue expression profiles. Nat Methods. 2015 May;12(5):453-7. doi: 10.1038/nmeth.3337. Epub 2015 Mar 30. PMID: 25822800; PMCID: PMC4739640.
Mixture	B cells naive	B cells memory	Plasma cells	T cells CD8	T cells CD4 naive	T cells CD4 memory resting	T cells CD4 memory activated	T cells follicular helper	T cells regulatory (Tregs)	T cells gamma delta	NK cells resting	NK cells activated	Monocytes	Macrophages M0	Macrophages M1	Macrophages M2	Dendritic cells resting	Dendritic cells activated	Mast cells resting	Mast cells activated	Eosinophils	Neutrophils	P-value	Correlation	RMSE
Con1	0.0301325	0	0.0537522	0.118274	0	0.180471	0	0.0412464	0.0217754	0.00203779	0.00455719	0.182214	0.00850096	0	0.00164737	0.266204	0	0.00734655	0.0818407	0	0	0	0.53	0.0303284	1.09472
Con2	0	0.0225043	0.0585431	0.0281764	0	0.198151	0	0.124152	0	0	0	0.195984	0.0532113	0.0176091	0	0.133221	0	0.0348113	0.128698	0	0.00493939	0	0.69	0.00975601	1.09688
Con3	0	0.099301	0.017208	0.101755	0	0.121621	0	0.0654324	0	0	0.0239886	0.128167	0.0859674	0.100008	0.00296346	0.0128039	0.0066286	0	0.199294	0	0.0348612	0	0.81	-0.00374081	1.09192
Con4	0	0.0869875	0.0256913	0.111404	0	0.1091	0	0.033478	0	0	0	0.184735	0.0465982	0.106261	0	0	0.00372827	0.0309936	0.252573	0	0.00844988	0	0.8	-0.000870467	1.10566
Con5	0	0.00688823	0.0364165	0.196905	0	0.123505	0	0.058507	0.035531	0	0.0531561	0.0671707	0.0770503	0	0.00984969	0.239211	0	0	0.0846128	0	0.0111974	0	0.96	-0.0346166	1.107
Con6	0	0.0228711	0.0725208	0.124088	0	0.142385	0	0.0626538	0.0329372	0	0.0734539	0.173936	0.00760875	0	0	0.198254	0	0.0220677	0.0672228	0	0	0	0.21	0.0873625	1.08115
Con7	0	0.0798093	0.0568851	0.245612	0	0.0112078	0	0.0510289	0	0	0	0.181282	0.0393359	0.0307038	0.0108024	0.0489283	0.000802423	0.00847066	0.219132	0	0.0159995	0	0.39	0.0470917	1.09313
Ba1	0.00373166	0	0.000502445	0.0865142	0	0.125346	0	0.0862212	0	0	0	0.148394	0.044409	0	0	0.288552	0	0.00448715	0.207204	0	0.00463852	0	0.87	-0.0111529	1.10056
Ba2	0	0	0.0309161	0.169728	0	0.112814	0	0.0827833	0	0	0	0.131482	0.0365516	0.0129321	0.00480687	0.188417	0	0.00523006	0.220678	0	0.00366112	0	0.81	-0.00321517	1.09879
Ba3	0	6.94658e-05	0.0385113	0.0797352	0	0.232626	0	0.0538538	0	0	0	0.201448	0.0626137	0.00064336	0.00297648	0.138154	0	0.0129696	0.176399	0	0	0	0.33	0.0562616	1.08639
Ba4	0	0.104025	0.0569048	0.14322	0	0.0746141	0	0.0197692	0	0	0.0564252	0.0636118	0.0759997	0	0.0181364	0.162975	0	0.00492067	0.219398	0	0	0	0.39	0.0469718	1.06266
Ba5	0	0	0.04684	0.201175	0	0.132478	0	0.0563066	0	0	0.0551782	0.0305754	0.0519304	0	0	0.221047	0	0.0095641	0.194905	0	0	0	0.7	0.00875184	1.08338
Ba6	0	0.0385819	0.000715577	0.0546389	0	0.372558	0	0.0375864	0	0	0.057621	0.0260032	0.0145345	0	0.0204424	0.238175	0	0.103118	0.0360251	0	0	0	0.82	-0.00489698	1.098
Ba7	0	0.024338	0.0113245	0.116067	0	0.189207	0	0.0809841	0	0	0	0.244182	0.0169655	0.0312124	0.00668714	0.0788427	0	0.00732974	0.19286	0	0	0	0.01	0.197943	1.0387
					sample	group
					A1	A
					A2	A
					B1	B
					B2	B
					B3	B
