# Supplementary material for: Immune-related hub genes in intrauterine adhesions: a bioinformatics approach
Source: PeerJ journal article supplement (doi:10.7717/peerj.20035), 2025-10-03
Supplement: qPCR_original_data.zip [file BIRC5+IGF1+WNT5A MICE 2025-6-25.xlsx]

## Sheet: Sheet1
hole	sample name	sample type	gene	Ct	Ct average value
A4	C1	unknown	BIRC5	30.12	30.59
A5	C1	unknown	BIRC5	30.17	30.59
A6	C1	unknown	BIRC5	31.48	30.59
B4	C2	unknown	BIRC5	26.71	26.95
B5	C2	unknown	BIRC5	27.26	26.95
B6	C2	unknown	BIRC5	26.87	26.95
C4	C3	unknown	BIRC5	27.39	27.23
C5	C3	unknown	BIRC5	27.22	27.23
C6	C3	unknown	BIRC5	27.09	27.23
E4	IUA3	unknown	BIRC5	24.58	24.48
E5	IUA3	unknown	BIRC5	24.37	24.48
E6	IUA3	unknown	BIRC5	24.5	24.48
F4	IUA1	unknown	BIRC5	21.66	21.75
F5	IUA1	unknown	BIRC5	22.03	21.75
F6	IUA1	unknown	BIRC5	21.58	21.75
G4	IUA3.3	unknown	BIRC5	27.08	27.19
G5	IUA3.3	unknown	BIRC5	27.59	27.19
G6	IUA3.3	unknown	BIRC5	26.89	27.19
A1	C1	unknown	GAPDH	28.44	27.86
A2	C1	unknown	GAPDH	27.8	27.86
A3	C1	unknown	GAPDH	27.35	27.86
B1	C2	unknown	GAPDH	21.75	21.75
B2	C2	unknown	GAPDH	21.78	21.75
B3	C2	unknown	GAPDH	21.73	21.75
C1	C3	unknown	GAPDH	21.9	21.84
C2	C3	unknown	GAPDH	21.72	21.84
C3	C3	unknown	GAPDH	21.91	21.84
E1	IUA3	unknown	GAPDH	17.88	17.86
E2	IUA3	unknown	GAPDH	17.83	17.86
E3	IUA3	unknown	GAPDH	17.87	17.86
F1	IUA1	unknown	GAPDH	13.94	13.93
F2	IUA1	unknown	GAPDH	14.11	13.93
F3	IUA1	unknown	GAPDH	13.74	13.93
G1	IUA3.3	unknown	GAPDH	16.6	16.8467
G2	IUA3.3	unknown	GAPDH	17.15	16.85
G3	IUA3.3	unknown	GAPDH	16.79	16.85
A10	C1	unknown	IGF1	30.8	30.07
A11	C1	unknown	IGF1	29.9	30.07
A12	C1	unknown	IGF1	29.51	30.07
B10	C2	unknown	IGF1	25.87	25.72
B11	C2	unknown	IGF1	25.64	25.72
B12	C2	unknown	IGF1	25.64	25.72
C10	C3	unknown	IGF1	26.92	26.78
C11	C3	unknown	IGF1	26.78	26.78
C12	C3	unknown	IGF1	26.64	26.78
E10	IUA3	unknown	IGF1	22.61	22.59
E11	IUA3	unknown	IGF1	22.61	22.59
E12	IUA3	unknown	IGF1	22.54	22.59
F10	IUA1	unknown	IGF1	20.19	20.32
F11	IUA1	unknown	IGF1	20.24	20.32
F12	IUA1	unknown	IGF1	20.52	20.32
G10	IUA3.3	unknown	IGF1	23.25	22.42
G11	IUA3.3	unknown	IGF1	22.23	22.42
G12	IUA3.3	unknown	IGF1	21.78	22.42
A7	C1	unknown	wnt5a	32.99	32.59
A8	C1	unknown	wnt5a	32.86	32.59
A9	C1	unknown	wnt5a	31.92	32.59
B7	C2	unknown	wnt5a	25.95	26.13
B8	C2	unknown	wnt5a	25.93	26.13
B9	C2	unknown	wnt5a	26.5	26.13
C7	C3	unknown	wnt5a	26.93	26.7
C8	C3	unknown	wnt5a	26.78	26.7
C9	C3	unknown	wnt5a	26.37	26.7
E7	IUA3	unknown	wnt5a	22.93	22.95
E8	IUA3	unknown	wnt5a	23.11	22.95
E9	IUA3	unknown	wnt5a	22.8	22.95
F7	IUA1	unknown	wnt5a	20.17	20.51
F8	IUA1	unknown	wnt5a	21.14	20.51
F9	IUA1	unknown	wnt5a	20.23	20.51
G7	IUA3.3	unknown	wnt5a	22.4	21.99
G8	IUA3.3	unknown	wnt5a	21.49	21.99
G9	IUA3.3	unknown	wnt5a	22.08	21.99
