# Supplementary material for: Immune-related hub genes in intrauterine adhesions: a bioinformatics approach
Source: PeerJ journal article supplement (doi:10.7717/peerj.20035), 2025-10-03
Supplement: qPCR_original_data.zip [file GDF7+PTGDS+CCL14 HUMAN 2024-5-30.xlsx]

## Sheet: GDF7+PTGDS+CCL14 HUMAN 2024-5-3
Title:
Date/Time:	2024-05-30 14:23:41	2024/5/30 15:30:55
Device:	qTOWER3/G	3107B-3423513
Operator:
Comments:
Colors+Dyes:	Pos	Color Module	Dye	Gain	Meas	Refr
	1	Blue.470.520.11.3	SybrGreen	5	*
Heated Lid:	100°C
TC Protocol:	steps	scan	°C	m:s	goto	loops	delta Temp(°C)	delta Time (s)	ramp (°C/s
	1		95	00:30	0	0	0	0	8
	2		95	00:05	0	0	0	0	6
	3	*	60	00:30	2	39	0	0	6
	4	*	60	00:15	4	35	1	0	5
Melt active:	Yes
Meas. Repeats:	3
Color Comp.:
hole	sample name	sample type	gene	Ct	Ct average value			Ct SD
E1	C1	unknown	CCL14	25.13	25.15			0.03
E2	C1	unknown	CCL14	25.15	25.15			0.03
E3	C1	unknown	CCL14	25.18	25.15			0.03
E4	C2	unknown	CCL14	26.04	25.97			0.1
E5	C2	unknown	CCL14	26.01	25.97			0.1
E6	C2	unknown	CCL14	25.85	25.97			0.1
E7	C3	unknown	CCL14	24.22	24.34			0.11
E8	C3	unknown	CCL14	24.44	24.34			0.11
E9	C3	unknown	CCL14	24.36	24.34			0.11
E10	C4	unknown	CCL14	24	24.11			0.09
E11	C4	unknown	CCL14	24.14	24.11			0.09
E12	C4	unknown	CCL14	24.18	24.11			0.09
F1	IUA1	unknown	CCL14	24.7	24.52			0.39
F2	IUA1	unknown	CCL14	24.07	24.52			0.39
F3	IUA1	unknown	CCL14	24.78	24.52			0.39
F4	IUA2	unknown	CCL14	22.33	22.3			0.09
F5	IUA2	unknown	CCL14	22.2	22.3			0.09
F6	IUA2	unknown	CCL14	22.38	22.3			0.09
F7	IUA3	unknown	CCL14	22.96	23.01			0.07
F8	IUA3	unknown	CCL14	22.99	23.01			0.07
F9	IUA3	unknown	CCL14	23.09	23.01			0.07
F10	IUA4	unknown	CCL14	23.25	23.33			0.1
F11	IUA4	unknown	CCL14	23.3	23.33			0.1
F12	IUA4	unknown	CCL14	23.43	23.33			0.1
A1	C1	unknown	GAPDH	17.01	16.96			0.16
A2	C1	unknown	GAPDH	17.08	16.96			0.16
A3	C1	unknown	GAPDH	16.78	16.96			0.16
A4	C2	unknown	GAPDH	20.12	20.08			0.04
A5	C2	unknown	GAPDH	20.08	20.08			0.04
A6	C2	unknown	GAPDH	20.04	20.08			0.04
A7	C3	unknown	GAPDH	20.11	20.1			0.03
A8	C3	unknown	GAPDH	20.06	20.1			0.03
A9	C3	unknown	GAPDH	20.12	20.1			0.03
A10	C4	unknown	GAPDH	15.33	15.43			0.1
A11	C4	unknown	GAPDH	15.41	15.43			0.1
A12	C4	unknown	GAPDH	15.54	15.43			0.1
B1	IUA1	unknown	GAPDH	18.88	18.78			0.09
B2	IUA1	unknown	GAPDH	18.72	18.78			0.09
B3	IUA1	unknown	GAPDH	18.73	18.78			0.09
B4	IUA2	unknown	GAPDH	17.6	17.57			0.06
B5	IUA2	unknown	GAPDH	17.6	17.57			0.06
B6	IUA2	unknown	GAPDH	17.5	17.57			0.06
B7	IUA3	unknown	GAPDH	19.01	18.85			0.14
B8	IUA3	unknown	GAPDH	18.78	18.85			0.14
B9	IUA3	unknown	GAPDH	18.76	18.85			0.14
B10	IUA4	unknown	GAPDH	17.14	17.04			0.13
B11	IUA4	unknown	GAPDH	17.1	17.04			0.13
B12	IUA4	unknown	GAPDH	16.89	17.04			0.13
C1	C1	unknown	GDF7	30.59	28.3			2.07
C2	C1	unknown	GDF7	27.75	28.3			2.07
C3	C1	unknown	GDF7	26.56	28.3			2.07
C4	C2	unknown	GDF7	33.17	33.81			1.01
C5	C2	unknown	GDF7	33.28	33.81			1.01
C6	C2	unknown	GDF7	34.97	33.81			1.01
C7	C3	unknown	GDF7	33.03	30.75			2.04
C8	C3	unknown	GDF7	30.1	30.75			2.04
C9	C3	unknown	GDF7	29.11	30.75			2.04
C10	C4	unknown	GDF7	26.81	27.76			2.17
C11	C4	unknown	GDF7	26.23	27.76			2.17
C12	C4	unknown	GDF7	30.24	27.76			2.17
D1	IUA1	unknown	GDF7	36.43	34.46			1.75
D2	IUA1	unknown	GDF7	33.86	34.46			1.75
D3	IUA1	unknown	GDF7	33.09	34.46			1.75
D4	IUA2	unknown	GDF7	31.68	32.4			0.63
D5	IUA2	unknown	GDF7	32.65	32.4			0.63
D6	IUA2	unknown	GDF7	32.86	32.4			0.63
D7	IUA3	unknown	GDF7	33.97	33.23			0.64
D8	IUA3	unknown	GDF7	32.79	33.23			0.64
D9	IUA3	unknown	GDF7	32.93	33.23			0.64
D10	IUA4	unknown	GDF7	31.25	32.54			2.35
D11	IUA4	unknown	GDF7	31.12	32.54			2.35
D12	IUA4	unknown	GDF7	35.25	32.54			2.35
G1	C1	unknown	PTGDS	19.45	19.49			0.04
G2	C1	unknown	PTGDS	19.52	19.49			0.04
G3	C1	unknown	PTGDS	19.51	19.49			0.04
G4	C2	unknown	PTGDS	22.41	22.26			0.13
G5	C2	unknown	PTGDS	22.21	22.26			0.13
G6	C2	unknown	PTGDS	22.16	22.26			0.13
G7	C3	unknown	PTGDS	21.11	21.09			0.02
G8	C3	unknown	PTGDS	21.08	21.09			0.02
G9	C3	unknown	PTGDS	21.09	21.09			0.02
G10	C4	unknown	PTGDS	18.28	18.26			0.02
G11	C4	unknown	PTGDS	18.26	18.26			0.02
G12	C4	unknown	PTGDS	18.25	18.26			0.02
H1	IUA1	unknown	PTGDS	23.01	22.9			0.12
H2	IUA1	unknown	PTGDS	22.93	22.9			0.12
H3	IUA1	unknown	PTGDS	22.78	22.9			0.12
H4	IUA2	unknown	PTGDS	18.45	18.55			0.11
H5	IUA2	unknown	PTGDS	18.67	18.55			0.11
H6	IUA2	unknown	PTGDS	18.53	18.55			0.11
H7	IUA3	unknown	PTGDS	20.02	19.88			0.17
H8	IUA3	unknown	PTGDS	19.92	19.88			0.17
H9	IUA3	unknown	PTGDS	19.68	19.88			0.17
H10	IUA4	unknown	PTGDS	19.05	19.19			0.13
H11	IUA4	unknown	PTGDS	19.22	19.19			0.13
H12	IUA4	unknown	PTGDS	19.3	19.19			0.13
