# Supplementary material for: Immune-related hub genes in intrauterine adhesions: a bioinformatics approach
Source: PeerJ journal article supplement (doi:10.7717/peerj.20035), 2025-10-03
Supplement: qPCR_original_data.zip [file GDF7+TUBB3+PTGDS HUMAN 2024-4-18.xlsx]

## Sheet: GDF7+TUBB3+PTGDS HUMAN 2024-4-1
Title:
Date/Time:	2024/4/18 12:40:05	2024/4/18 13:46:56
Device:	qTOWER3/G	3107B-3423513
Operator:
Comments:
Colors+Dyes:	Pos	Color Module	Dye	Gain	Meas	Refr
	1	Blue.470.520.11.3	SybrGreen	5	*
Heated Lid:	100°C
TC Protocol:	steps	scan	°C	m:s	goto	loops	delta Temp(°C)	delta Time (s)	ramp (°C/s
	1		95	00:30	0	0	0	0	8
	2		95	00:05	0	0	0	0	6
	3	*	60	00:30	2	39	0	0	6
	4	*	60	00:15	4	35	1	0	5
Melt active:	Yes
Meas. Repeats:	3
Color Comp.:
hole	sample name	sample type	gene	Ct	Ct average value			Ct SD
A1	N1	unknown	GAPDH	16.45	16.67			0.19
A2	N1	unknown	GAPDH	16.78	16.67			0.19
A3	N1	unknown	GAPDH	16.78	16.67			0.19
A4	N2	unknown	GAPDH	19.96	19.93			0.12
A5	N2	unknown	GAPDH	19.81	19.93			0.12
A6	N2	unknown	GAPDH	20.04	19.93			0.12
A7	N3	unknown	GAPDH	20.37	20.28			0.09
A8	N3	unknown	GAPDH	20.18	20.28			0.09
A9	N3	unknown	GAPDH	20.3	20.28			0.09
A10	N4	unknown	GAPDH	15.32	15.27			0.04
A11	N4	unknown	GAPDH	15.23	15.27			0.04
A12	N4	unknown	GAPDH	15.26	15.27			0.04
B1	IUA1	unknown	GAPDH	15	14.87			0.23
B2	IUA1	unknown	GAPDH	14.6	14.87			0.23
B3	IUA1	unknown	GAPDH	15.02	14.87			0.23
B4	IUA2	unknown	GAPDH	19.24	19.21			0.06
B5	IUA2	unknown	GAPDH	19.14	19.21			0.06
B6	IUA2	unknown	GAPDH	19.25	19.21			0.06
B7	IUA3	unknown	GAPDH	16.03	16.08			0.06
B8	IUA3	unknown	GAPDH	16.14	16.08			0.06
B9	IUA3	unknown	GAPDH	16.06	16.08			0.06
B10	IUA4	unknown	GAPDH	15.61	15.63			0.1
B11	IUA4	unknown	GAPDH	15.74	15.63			0.1
B12	IUA4	unknown	GAPDH	15.54	15.63			0.1
G1	N1	unknown	GDF7	32.55	30.75			1.6
G2	N1	unknown	GDF7	29.5	30.75			1.6
G3	N1	unknown	GDF7	30.19	30.75			1.6
G4	N2	unknown	GDF7	34.15	34.74			0.84
G5	N2	unknown	GDF7	35.34	34.74			0.84
G6	N2	unknown	GDF7	none
G7	N3	unknown	GDF7	34.04	32.29			1.56
G8	N3	unknown	GDF7	31.82	32.29			1.56
G9	N3	unknown	GDF7	31.03	32.29			1.56
G10	N4	unknown	GDF7	26.34	27.65			1.87
G11	N4	unknown	GDF7	26.82	27.65			1.87
G12	N4	unknown	GDF7	29.79	27.65			1.87
H1	IUA1	unknown	GDF7	34.11	32.88			1.48
H2	IUA1	unknown	GDF7	31.24	32.88			1.48
H3	IUA1	unknown	GDF7	33.28	32.88			1.48
H4	IUA2	unknown	GDF7	32.51	33.55			0.92
H5	IUA2	unknown	GDF7	33.88	33.55			0.92
H6	IUA2	unknown	GDF7	34.27	33.55			0.92
H7	IUA3	unknown	GDF7	33.38	34			0.72
H8	IUA3	unknown	GDF7	34.8	34			0.72
H9	IUA3	unknown	GDF7	33.81	34			0.72
H10	IUA4	unknown	GDF7	32.23	32.71			0.53
H11	IUA4	unknown	GDF7	32.62	32.71			0.53
H12	IUA4	unknown	GDF7	33.27	32.71			0.53
C1	N1	unknown	PTGDS	19.46	19.52			0.17
C2	N1	unknown	PTGDS	19.39	19.52			0.17
C3	N1	unknown	PTGDS	19.71	19.52			0.17
C4	N2	unknown	PTGDS	22.35	22.21			0.16
C5	N2	unknown	PTGDS	22.04	22.21			0.16
C6	N2	unknown	PTGDS	22.24	22.21			0.16
C7	N3	unknown	PTGDS	21.55	21.51			0.05
C8	N3	unknown	PTGDS	21.52	21.51			0.05
C9	N3	unknown	PTGDS	21.45	21.51			0.05
C10	N4	unknown	PTGDS	18.06	18.07			0.03
C11	N4	unknown	PTGDS	18.1	18.07			0.03
C12	N4	unknown	PTGDS	18.04	18.07			0.03
D1	IUA1	unknown	PTGDS	18.55	18.48			0.07
D2	IUA1	unknown	PTGDS	18.41	18.48			0.07
D3	IUA1	unknown	PTGDS	18.48	18.48			0.07
D4	IUA2	unknown	PTGDS	24.31	24.36			0.07
D5	IUA2	unknown	PTGDS	24.34	24.36			0.07
D6	IUA2	unknown	PTGDS	24.44	24.36			0.07
D7	IUA3	unknown	PTGDS	17.85	17.85			0.01
D8	IUA3	unknown	PTGDS	17.84	17.85			0.01
D9	IUA3	unknown	PTGDS	17.86	17.85			0.01
D10	IUA4	unknown	PTGDS	18	17.94			0.08
D11	IUA4	unknown	PTGDS	17.97	17.94			0.08
D12	IUA4	unknown	PTGDS	17.85	17.94			0.08
E1	N1	unknown	TUBB3	22.62	22.67			0.05
E2	N1	unknown	TUBB3	22.72	22.67			0.05
E3	N1	unknown	TUBB3	22.68	22.67			0.05
E4	N2	unknown	TUBB3	26.75	26.94			0.18
E5	N2	unknown	TUBB3	26.97	26.94			0.18
E6	N2	unknown	TUBB3	27.1	26.94			0.18
E7	N3	unknown	TUBB3	26.84	26.71			0.14
E8	N3	unknown	TUBB3	26.74	26.71			0.14
E9	N3	unknown	TUBB3	26.56	26.71			0.14
E10	N4	unknown	TUBB3	21.04	21.18			0.12
E11	N4	unknown	TUBB3	21.25	21.18			0.12
E12	N4	unknown	TUBB3	21.26	21.18			0.12
F1	IUA1	unknown	TUBB3	20.79	20.62			0.15
F2	IUA1	unknown	TUBB3	20.55	20.62			0.15
F3	IUA1	unknown	TUBB3	20.51	20.62			0.15
F4	IUA2	unknown	TUBB3	26.21	26.17			0.05
F5	IUA2	unknown	TUBB3	26.11	26.17			0.05
F6	IUA2	unknown	TUBB3	26.18	26.17			0.05
F7	IUA3	unknown	TUBB3	22.14	22.23			0.1
F8	IUA3	unknown	TUBB3	22.21	22.23			0.1
F9	IUA3	unknown	TUBB3	22.33	22.23			0.1
F10	IUA4	unknown	TUBB3	21.24	21.43			0.36
F11	IUA4	unknown	TUBB3	21.2	21.43			0.36
F12	IUA4	unknown	TUBB3	21.84	21.43			0.36
