# Supplementary material for: Immune-related hub genes in intrauterine adhesions: a bioinformatics approach
Source: PeerJ journal article supplement (doi:10.7717/peerj.20035), 2025-10-03
Supplement: qPCR_original_data.zip [file GDF7+TUBB3+PTGDS HUMAN 2024-5-28.xlsx]

## Sheet: GDF7+TUBB3+PTGDS  HUMAN 2024-5-
Title:
Date/Time:	2024/5/28 12:51:33	2024/5/28 13:58:55
Device:	qTOWER3/G	3107B-3423513
Operator:
Comments:
Colors+Dyes:	Pos	Color Module	Dye	Gain	Meas	Refr
	1	Blue.470.520.11.3	SybrGreen	5	*
Heated Lid:	100°C
TC Protocol:	steps	scan	°C	m:s	goto	loops	delta Temp(°C)	delta Time (s)	ramp (°C/s
	1		95	00:30	0	0	0	0	8
	2		95	00:05	0	0	0	0	6
	3	*	60	00:30	2	39	0	0	6
	4	*	60	00:15	4	35	1	0	5
Melt active:	Yes
Meas. Repeats:	3
Color Comp.:
hole	sample name	sample type	gene	Ct	Ct average value			Ct SD
A1	C1	unknown	GAPDH	16.59	16.73			0.15
A2	C1	unknown	GAPDH	16.89	16.73			0.15
A3	C1	unknown	GAPDH	16.7	16.73			0.15
A4	C2	unknown	GAPDH	20.26	20.24			0.02
A5	C2	unknown	GAPDH	20.22	20.24			0.02
A6	C2	unknown	GAPDH	20.24	20.24			0.02
A7	C3	unknown	GAPDH	19.91	20			0.1
A8	C3	unknown	GAPDH	19.99	20			0.1
A9	C3	unknown	GAPDH	20.11	20			0.1
A10	C4	unknown	GAPDH	15.2	15.23			0.03
A11	C4	unknown	GAPDH	15.24	15.23			0.03
A12	C4	unknown	GAPDH	15.26	15.23			0.03
B1	IUA1	unknown	GAPDH	18.82	18.85			0.12
B2	IUA1	unknown	GAPDH	18.98	18.85			0.12
B3	IUA1	unknown	GAPDH	18.75	18.85			0.12
B4	IUA2	unknown	GAPDH	17.99	17.87			0.11
B5	IUA2	unknown	GAPDH	17.79	17.87			0.11
B6	IUA2	unknown	GAPDH	17.82	17.87			0.11
B7	IUA3	unknown	GAPDH	18.19	18.22			0.05
B8	IUA3	unknown	GAPDH	18.2	18.22			0.05
B9	IUA3	unknown	GAPDH	18.27	18.22			0.05
B10	IUA4	unknown	GAPDH	16.46	16.68			0.19
B11	IUA4	unknown	GAPDH	16.75	16.68			0.19
B12	IUA4	unknown	GAPDH	16.82	16.68			0.19
G1	C1	unknown	GDF7	none
G2	C1	unknown	GDF7	33.11	32.56			0.77
G3	C1	unknown	GDF7	32.02	32.56			0.77
G4	C2	unknown	GDF7	none
G5	C2	unknown	GDF7	none
G6	C2	unknown	GDF7	none
G7	C3	unknown	GDF7	34	33.93			0.07
G8	C3	unknown	GDF7	33.93	33.93			0.07
G9	C3	unknown	GDF7	33.85	33.93			0.07
G10	C4	unknown	GDF7	24.01	26.95			5.26
G11	C4	unknown	GDF7	23.82	26.95			5.26
G12	C4	unknown	GDF7	33.02	26.95			5.26
H1	IUA1	unknown	GDF7	none
H2	IUA1	unknown	GDF7	34.09	34.09			0
H3	IUA1	unknown	GDF7	none
H4	IUA2	unknown	GDF7	34.05	34.05			0
H5	IUA2	unknown	GDF7	none
H6	IUA2	unknown	GDF7	none
H7	IUA3	unknown	GDF7	33.13	34.29			1.64
H8	IUA3	unknown	GDF7	none
H9	IUA3	unknown	GDF7	35.45	34.29			1.64
H10	IUA4	unknown	GDF7	none
H11	IUA4	unknown	GDF7	33.46	33.49			0.05
H12	IUA4	unknown	GDF7	33.53	33.49			0.05
E1	C1	unknown	PTGDS	20.07	20.05			0.02
E2	C1	unknown	PTGDS	20.03	20.05			0.02
E3	C1	unknown	PTGDS	20.05	20.05			0.02
E4	C2	unknown	PTGDS	22.32	22.45			0.26
E5	C2	unknown	PTGDS	22.29	22.45			0.26
E6	C2	unknown	PTGDS	22.75	22.45			0.26
E7	C3	unknown	PTGDS	21.16	21.13			0.06
E8	C3	unknown	PTGDS	21.06	21.13			0.06
E9	C3	unknown	PTGDS	21.16	21.13			0.06
E10	C4	unknown	PTGDS	18.38	18.42			0.04
E11	C4	unknown	PTGDS	18.43	18.42			0.04
E12	C4	unknown	PTGDS	18.46	18.42			0.04
F1	IUA1	unknown	PTGDS	22.61	22.9			0.53
F2	IUA1	unknown	PTGDS	22.58	22.9			0.53
F3	IUA1	unknown	PTGDS	23.52	22.9			0.53
F4	IUA2	unknown	PTGDS	18.45	18.53			0.07
F5	IUA2	unknown	PTGDS	18.6	18.53			0.07
F6	IUA2	unknown	PTGDS	18.55	18.53			0.07
F7	IUA3	unknown	PTGDS	19.21	19.24			0.04
F8	IUA3	unknown	PTGDS	19.28	19.24			0.04
F9	IUA3	unknown	PTGDS	19.22	19.24			0.04
F10	IUA4	unknown	PTGDS	19.21	19.21			0.07
F11	IUA4	unknown	PTGDS	19.14	19.21			0.07
F12	IUA4	unknown	PTGDS	19.28	19.21			0.07
C1	C1	unknown	TUBB3	23.16	23.14			0.07
C2	C1	unknown	TUBB3	23.2	23.14			0.07
C3	C1	unknown	TUBB3	23.05	23.14			0.07
C4	C2	unknown	TUBB3	27.51	27.32			0.26
C5	C2	unknown	TUBB3	27.42	27.32			0.26
C6	C2	unknown	TUBB3	27.02	27.32			0.26
C7	C3	unknown	TUBB3	26.57	26.4			0.15
C8	C3	unknown	TUBB3	26.29	26.4			0.15
C9	C3	unknown	TUBB3	26.34	26.4			0.15
C10	C4	unknown	TUBB3	21.48	21.57			0.1
C11	C4	unknown	TUBB3	21.68	21.57			0.1
C12	C4	unknown	TUBB3	21.56	21.57			0.1
D1	IUA1	unknown	TUBB3	25.34	25.36			0.18
D2	IUA1	unknown	TUBB3	25.19	25.36			0.18
D3	IUA1	unknown	TUBB3	25.55	25.36			0.18
D4	IUA2	unknown	TUBB3	26.29	26.37			0.09
D5	IUA2	unknown	TUBB3	26.47	26.37			0.09
D6	IUA2	unknown	TUBB3	26.35	26.37			0.09
D7	IUA3	unknown	TUBB3	24.26	24.3			0.16
D8	IUA3	unknown	TUBB3	24.17	24.3			0.16
D9	IUA3	unknown	TUBB3	24.48	24.3			0.16
D10	IUA4	unknown	TUBB3	22.9	22.93			0.02
D11	IUA4	unknown	TUBB3	22.95	22.93			0.02
D12	IUA4	unknown	TUBB3	22.92	22.93			0.02
