# Supplementary material for: Immune-related hub genes in intrauterine adhesions: a bioinformatics approach
Source: PeerJ journal article supplement (doi:10.7717/peerj.20035), 2025-10-03
Supplement: qPCR_original_data.zip [file GDF7+TUBB3+PTGDS MICE 2024-4-25.xlsx]

## Sheet: GDF7+TUBB3+PTGDS MICE 2024-4-25
Title:
Date/Time:	2024/4/25 15:41:58	2024/4/25 16:49:12
Device:	qTOWER3/G	3107B-3423513
Operator:
Comments:
Colors+Dyes:	Pos	Color Module	Dye	Gain	Meas	Refr
	1	Blue.470.520.11.3	SybrGreen	5	*
Heated Lid:	100°C
TC Protocol:	steps	scan	°C	m:s	goto	loops	delta Temp(°C)	delta Time (s)	ramp (°C/s
	1		95	00:30	0	0	0	0	8
	2		95	00:05	0	0	0	0	6
	3	*	60	00:30	2	39	0	0	6
	4	*	60	00:15	4	35	1	0	5
Melt active:	Yes
Meas. Repeats:	3
Color Comp.:
hole	sample name	sample type	gene	Ct	Ct average value			Ct SD
A1	C1	unknown	GAPDN	14.09	14.06			0.14
A2	C1	unknown	GAPDN	13.91	14.06			0.14
A3	C1	unknown	GAPDN	14.19	14.06			0.14
A4	C2	unknown	GAPDN	12.4	12.44			0.06
A5	C2	unknown	GAPDN	12.41	12.44			0.06
A6	C2	unknown	GAPDN	12.51	12.44			0.06
A7	C3	unknown	GAPDN	12.33	12.16			0.15
A8	C3	unknown	GAPDN	12.1	12.16			0.15
A9	C3	unknown	GAPDN	12.05	12.16			0.15
A10	C4	unknown	GAPDN	14.55	14.38			0.22
A11	C4	unknown	GAPDN	14.13	14.38			0.22
A12	C4	unknown	GAPDN	14.46	14.38			0.22
B1	I1	unknown	GAPDN	13.1	12.86			0.24
B2	I1	unknown	GAPDN	12.62	12.86			0.24
B3	I1	unknown	GAPDN	12.84	12.86			0.24
B4	I2	unknown	GAPDN	12.73	12.58			0.16
B5	I2	unknown	GAPDN	12.58	12.58			0.16
B6	I2	unknown	GAPDN	12.41	12.58			0.16
B7	I3	unknown	GAPDN	13.58	12.96			0.89
B8	I3	unknown	GAPDN	12.33	12.96			0.89
B9	I3	unknown	GAPDN	none
B10	I4	unknown	GAPDN	13.47	13.58			0.11
B11	I4	unknown	GAPDN	13.58	13.58			0.11
B12	I4	unknown	GAPDN	13.69	13.58			0.11
C1	C1	unknown	GDF7	21.18	21.19			0.1
C2	C1	unknown	GDF7	21.1	21.19			0.1
C3	C1	unknown	GDF7	21.29	21.19			0.1
C4	C2	unknown	GDF7	33.23	23.46			8.47
C5	C2	unknown	GDF7	18.12	23.46			8.47
C6	C2	unknown	GDF7	19.05	23.46			8.47
C7	C3	unknown	GDF7	18.84	18.94			0.09
C8	C3	unknown	GDF7	18.96	18.94			0.09
C9	C3	unknown	GDF7	19.02	18.94			0.09
C10	C4	unknown	GDF7	21.35	21.54			0.17
C11	C4	unknown	GDF7	21.62	21.54			0.17
C12	C4	unknown	GDF7	21.65	21.54			0.17
D1	I1	unknown	GDF7	20.19	20.11			0.1
D2	I1	unknown	GDF7	20	20.11			0.1
D3	I1	unknown	GDF7	20.15	20.11			0.1
D4	I2	unknown	GDF7	19.55	19.61			0.07
D5	I2	unknown	GDF7	19.59	19.61			0.07
D6	I2	unknown	GDF7	19.69	19.61			0.07
D7	I3	unknown	GDF7	24.71	24.59			0.16
D8	I3	unknown	GDF7	24.41	24.59			0.16
D9	I3	unknown	GDF7	24.66	24.59			0.16
D10	I4	unknown	GDF7	24.7	24.74			0.04
D11	I4	unknown	GDF7	24.74	24.74			0.04
D12	I4	unknown	GDF7	24.77	24.74			0.04
G1	C1	unknown	PTGDS	25.04	25.7			0.6
G2	C1	unknown	PTGDS	26.19	25.7			0.6
G3	C1	unknown	PTGDS	25.86	25.7			0.6
G4	C2	unknown	PTGDS	24.17	24.19			0.36
G5	C2	unknown	PTGDS	23.83	24.19			0.36
G6	C2	unknown	PTGDS	24.56	24.19			0.36
G7	C3	unknown	PTGDS	25.05	25.05			0
G8	C4	unknown	PTGDS	25.25	25.28			0.07
G9	C4	unknown	PTGDS	25.27	25.28			0.07
G10	C4	unknown	PTGDS	25.4	25.28			0.07
G11	C4	unknown	PTGDS	25.25	25.28			0.07
G12	C4	unknown	PTGDS	25.21	25.28			0.07
H1	I1	unknown	PTGDS	23.12	23.12			0.01
H2	I1	unknown	PTGDS	23.13	23.12			0.01
H3	I1	unknown	PTGDS	23.11	23.12			0.01
H4	I2	unknown	PTGDS	22.87	23.11			0.22
H5	I2	unknown	PTGDS	23.31	23.11			0.22
H6	I2	unknown	PTGDS	23.14	23.11			0.22
H7	I3	unknown	PTGDS	26.39	26.54			0.22
H8	I3	unknown	PTGDS	26.7	26.54			0.22
H9	I4	unknown	PTGDS	26.6	27.39			0.95
H10	I4	unknown	PTGDS	26.56	27.39			0.95
H11	I4	unknown	PTGDS	28.39	27.39			0.95
H12	I4	unknown	PTGDS	28.02	27.39			0.95
E1	C1	unknown	TUBB3	26.42	26.49			0.06
E2	C1	unknown	TUBB3	26.51	26.49			0.06
E3	C1	unknown	TUBB3	26.53	26.49			0.06
E4	C2	unknown	TUBB3	24.92	24.88			0.06
E5	C2	unknown	TUBB3	24.9	24.88			0.06
E6	C2	unknown	TUBB3	24.82	24.88			0.06
E7	C3	unknown	TUBB3	24.25	24.61			0.33
E8	C3	unknown	TUBB3	24.67	24.61			0.33
E9	C3	unknown	TUBB3	24.91	24.61			0.33
E10	C4	unknown	TUBB3	26.55	26.88			0.28
E11	C4	unknown	TUBB3	27.05	26.88			0.28
E12	C4	unknown	TUBB3	27.03	26.88			0.28
F1	I1	unknown	TUBB3	23.62	23.64			0.05
F2	I1	unknown	TUBB3	23.7	23.64			0.05
F3	I1	unknown	TUBB3	23.6	23.64			0.05
F4	I2	unknown	TUBB3	23.37	23.37			0.01
F5	I2	unknown	TUBB3	23.36	23.37			0.01
F6	I2	unknown	TUBB3	23.38	23.37			0.01
F7	I3	unknown	TUBB3	27.83	27.58			0.7
F8	I3	unknown	TUBB3	26.79	27.58			0.7
F9	I3	unknown	TUBB3	28.13	27.58			0.7
F10	I4	unknown	TUBB3	27.85	28.2			0.44
F11	I4	unknown	TUBB3	28.05	28.2			0.44
F12	I4	unknown	TUBB3	28.7	28.2			0.44
