# Supplementary material for: Immune-related hub genes in intrauterine adhesions: a bioinformatics approach
Source: PeerJ journal article supplement (doi:10.7717/peerj.20035), 2025-10-03
Supplement: qPCR_original_data.zip [file IGF1+WNT5A+BIRC5 HUMAN 2024-05-20.xlsx]

## Sheet: LFQ20240520
Date/Time:	2024/5/20 14:33:46	2024/5/20 15:41:09
Device:	qTOWER3/G	3107B-3423513
Color Comp.:
Colors+Dyes:	Pos	Color Module	Dye	Gain	Meas	Refr
Comments:
Heated Lid:	100°C
Meas. Repeats:	3
Melt active:	Yes
Operator:
TC Protocol:	steps	scan	°C	m:s	goto	loops	delta Temp(°C)	delta Time (s)	ramp (°C/s
Title:
hole	sample name	sample type	gene	Ct	Ct average value			Ct SD
A1	c1	unknown	GAPDH	17.11	17.3			0.7
A10	c4	unknown	GAPDH	21.23	21.02			0.28
A11	c4	unknown	GAPDH	20.71	21.02			0.28
A12	c4	unknown	GAPDH	21.13	21.02			0.28
A2	c1	unknown	GAPDH	18.08	17.3			0.7
A3	c1	unknown	GAPDH	16.71	17.3			0.7
A4	c2	unknown	GAPDH	20	20.05			0.05
A5	c2	unknown	GAPDH	20.05	20.05			0.05
A6	c2	unknown	GAPDH	20.09	20.05			0.05
A7	c3	unknown	GAPDH	21.43	21.34			0.08
A8	c3	unknown	GAPDH	21.27	21.34			0.08
A9	c3	unknown	GAPDH	21.34	21.34			0.08
B1	IUA1	unknown	GAPDH	19.83	19.29			0.96
B10	IUA4	unknown	GAPDH	16.86	16.8			0.66
B11	IUA4	unknown	GAPDH	17.44	16.8			0.66
B12	IUA4	unknown	GAPDH	16.12	16.8			0.66
B2	IUA1	unknown	GAPDH	19.85	19.29			0.96
B3	IUA1	unknown	GAPDH	18.18	19.29			0.96
B4	IUA2	unknown	GAPDH	17.5	17.72			0.28
B5	IUA2	unknown	GAPDH	18.04	17.72			0.28
B6	IUA2	unknown	GAPDH	17.61	17.72			0.28
B7	IUA3	unknown	GAPDH	18.3	18.17			0.12
B8	IUA3	unknown	GAPDH	18.08	18.17			0.12
B9	IUA3	unknown	GAPDH	18.14	18.17			0.12
C1	c1	unknown	IGF1	16.72	16.75			0.14
C10	c4	unknown	IGF1	21.47	21.39			0.1
C11	c4	unknown	IGF1	21.27	21.39			0.1
C12	c4	unknown	IGF1	21.41	21.39			0.1
C2	c1	unknown	IGF1	16.91	16.75			0.14
C3	c1	unknown	IGF1	16.63	16.75			0.14
C4	c2	unknown	IGF1	20.97	20.71			0.22
C5	c2	unknown	IGF1	20.56	20.71			0.22
C6	c2	unknown	IGF1	20.61	20.71			0.22
C7	c3	unknown	IGF1	21.55	21.55			0.01
C8	c3	unknown	IGF1	21.54	21.55			0.01
C9	c3	unknown	IGF1	21.56	21.55			0.01
D1	IUA1	unknown	IGF1	21.67	23.3			1.41
D10	IUA4	unknown	IGF1	17.25	17.09			0.27
D11	IUA4	unknown	IGF1	17.23	17.09			0.27
D12	IUA4	unknown	IGF1	16.77	17.09			0.27
D2	IUA1	unknown	IGF1	23.98	23.3			1.41
D3	IUA1	unknown	IGF1	24.23	23.3			1.41
D4	IUA2	unknown	IGF1	18.52	18.39			0.14
D5	IUA2	unknown	IGF1	18.24	18.39			0.14
D6	IUA2	unknown	IGF1	18.4	18.39			0.14
D7	IUA3	unknown	IGF1	21.05	21.02			0.12
D8	IUA3	unknown	IGF1	21.12	21.02			0.12
D9	IUA3	unknown	IGF1	20.88	21.02			0.12
E1	c1	unknown	WNT5A	21.26	21.06			1.35
E10	c4	unknown	WNT5A	26.7	26.73			0.1
E11	c4	unknown	WNT5A	26.84	26.73			0.1
E12	c4	unknown	WNT5A	26.64	26.73			0.1
E2	c1	unknown	WNT5A	22.31	21.06			1.35
E3	c1	unknown	WNT5A	19.62	21.06			1.35
E4	c2	unknown	WNT5A	24.06	25.49			1.24
E5	c2	unknown	WNT5A	26.2	25.49			1.24
E6	c2	unknown	WNT5A	26.2	25.49			1.24
E7	c3	unknown	WNT5A	27.72	27.41			0.35
E8	c3	unknown	WNT5A	27.03	27.41			0.35
E9	c3	unknown	WNT5A	27.47	27.41			0.35
F1	IUA1	unknown	WNT5A	24.58	24.31			0.24
F10	IUA4	unknown	WNT5A	21.85	21.91			0.06
F11	IUA4	unknown	WNT5A	21.92	21.91			0.06
F12	IUA4	unknown	WNT5A	21.96	21.91			0.06
F2	IUA1	unknown	WNT5A	24.17	24.31			0.24
F3	IUA1	unknown	WNT5A	24.16	24.31			0.24
F4	IUA2	unknown	WNT5A	24.06	24.26			0.34
F5	IUA2	unknown	WNT5A	24.08	24.26			0.34
F6	IUA2	unknown	WNT5A	24.65	24.26			0.34
F7	IUA3	unknown	WNT5A	25.14	25.13			0.04
F8	IUA3	unknown	WNT5A	25.16	25.13			0.04
F9	IUA3	unknown	WNT5A	25.09	25.13			0.04
G1	c1	unknown	BIRC5	19.07	19.92			0.92
G10	c4	unknown	BIRC5	22.38	22.41			0.13
G11	c4	unknown	BIRC5	22.29	22.41			0.13
G12	c4	unknown	BIRC5	22.55	22.41			0.13
G2	c1	unknown	BIRC5	20.9	19.92			0.92
G3	c1	unknown	BIRC5	19.78	19.92			0.92
G4	c2	unknown	BIRC5	24.23	23.91			0.36
G5	c2	unknown	BIRC5	23.53	23.91			0.36
G6	c2	unknown	BIRC5	23.99	23.91			0.36
G7	c3	unknown	BIRC5	23.87	23.51			0.32
G8	c3	unknown	BIRC5	23.38	23.51			0.32
G9	c3	unknown	BIRC5	23.27	23.51			0.32
H1	IUA1	unknown	BIRC5	21.94	22.74			1.2
H10	IUA4	unknown	BIRC5	20.14	20.29			0.15
H11	IUA4	unknown	BIRC5	20.28	20.29			0.15
H12	IUA4	unknown	BIRC5	20.44	20.29			0.15
H2	IUA1	unknown	BIRC5	24.12	22.74			1.2
H3	IUA1	unknown	BIRC5	22.16	22.74			1.2
H4	IUA2	unknown	BIRC5	23.05	22.97			0.14
H5	IUA2	unknown	BIRC5	23.06	22.97			0.14
H6	IUA2	unknown	BIRC5	22.8	22.97			0.14
H7	IUA3	unknown	BIRC5	22.23	22.18			0.09
H8	IUA3	unknown	BIRC5	22.08	22.18			0.09
H9	IUA3	unknown	BIRC5	22.24	22.18			0.09
