# Supplementary material for: Immune-related hub genes in intrauterine adhesions: a bioinformatics approach
Source: PeerJ journal article supplement (doi:10.7717/peerj.20035), 2025-10-03
Supplement: qPCR_original_data.zip [file IGF1+WNT5A+BIRC5 HUMAN 2024-05-21.xlsx]

## Sheet: IGF1+WNT5A+BIRC5 HUMAN 2024-05-
Title:
Date/Time:	2024/5/21 14:58:17	2024/5/21 16:05:40
Device:	qTOWER3/G	3107B-3423513
Operator:
Comments:
Colors+Dyes:	Pos	Color Module	Dye	Gain	Meas	Refr
	1	Blue.470.520.11.3	SybrGreen	5	*
Heated Lid:	100°C
TC Protocol:	steps	scan	°C	m:s	goto	loops	delta Temp(°C)	delta Time (s)	ramp (°C/s
	1		95	00:30	0	0	0	0	8
	2		95	00:05	0	0	0	0	6
	3	*	60	00:30	2	39	0	0	6
	4	*	60	00:15	4	35	1	0	5
Melt active:	Yes
Meas. Repeats:	3
Color Comp.:
hole	sample name	sample type	gene	Ct	Ct average value			Ct SD
G1	C1	unknown	BIRC5	22.76	22.41			0.3
G2	C1	unknown	BIRC5	22.26	22.41			0.3
G3	C1	unknown	BIRC5	22.23	22.41			0.3
G4	C2	unknown	BIRC5	27.32	26.97			0.31
G5	C2	unknown	BIRC5	26.73	26.97			0.31
G6	C2	unknown	BIRC5	26.87	26.97			0.31
G7	C3	unknown	BIRC5	26.23	26.35			0.1
G8	C3	unknown	BIRC5	26.41	26.35			0.1
G9	C3	unknown	BIRC5	26.41	26.35			0.1
G10	C4	unknown	BIRC5	21.15	21.16			0.02
G11	C4	unknown	BIRC5	21.18	21.16			0.02
G12	C4	unknown	BIRC5	21.14	21.16			0.02
H1	IUA1	unknown	BIRC5	25.42	25.31			0.13
H2	IUA1	unknown	BIRC5	25.17	25.31			0.13
H3	IUA1	unknown	BIRC5	25.35	25.31			0.13
H4	IUA2	unknown	BIRC5	25.53	25.3			0.2
H5	IUA2	unknown	BIRC5	25.16	25.3			0.2
H6	IUA2	unknown	BIRC5	25.21	25.3			0.2
H7	IUA3	unknown	BIRC5	26.32	26.34			0.15
H8	IUA3	unknown	BIRC5	26.2	26.34			0.15
H9	IUA3	unknown	BIRC5	26.5	26.34			0.15
H10	IUA4	unknown	BIRC5	23.07	23.03			0.04
H11	IUA4	unknown	BIRC5	23.02	23.03			0.04
H12	IUA4	unknown	BIRC5	22.99	23.03			0.04
A1	C1	unknown	GAPDH	25.66	25.79			1.93
A2	C1	unknown	GAPDH	23.93	25.79			1.93
A3	C1	unknown	GAPDH	27.78	25.79			1.93
A4	C2	unknown	GAPDH	33.19	30.03			2.9
A5	C2	unknown	GAPDH	27.51	30.03			2.9
A6	C2	unknown	GAPDH	29.39	30.03			2.9
A7	C3	unknown	GAPDH	26.28	25.88			0.57
A8	C3	unknown	GAPDH	26.15	25.88			0.57
A9	C3	unknown	GAPDH	25.22	25.88			0.57
A10	C4	unknown	GAPDH	20.57	20.7			0.48
A11	C4	unknown	GAPDH	20.31	20.7			0.48
A12	C4	unknown	GAPDH	21.23	20.7			0.48
B1	IUA1	unknown	GAPDH	24.32	25.58			1.13
B2	IUA1	unknown	GAPDH	25.96	25.58			1.13
B3	IUA1	unknown	GAPDH	26.48	25.58			1.13
B4	IUA2	unknown	GAPDH	26.46	25.12			1.17
B5	IUA2	unknown	GAPDH	24.64	25.12			1.17
B6	IUA2	unknown	GAPDH	24.26	25.12			1.17
B7	IUA3	unknown	GAPDH	25.23	25.07			0.24
B8	IUA3	unknown	GAPDH	25.18	25.07			0.24
B9	IUA3	unknown	GAPDH	24.79	25.07			0.24
B10	IUA4	unknown	GAPDH	22.16	21.69			1.16
B11	IUA4	unknown	GAPDH	22.54	21.69			1.16
B12	IUA4	unknown	GAPDH	20.36	21.69			1.16
C1	C1	unknown	IGF1	18.02	17.96			0.16
C2	C1	unknown	IGF1	17.78	17.96			0.16
C3	C1	unknown	IGF1	18.08	17.96			0.16
C4	C2	unknown	IGF1	21.94	21.91			0.05
C5	C2	unknown	IGF1	21.85	21.91			0.05
C6	C2	unknown	IGF1	21.94	21.91			0.05
C7	C3	unknown	IGF1	21.05	21.08			0.02
C8	C3	unknown	IGF1	21.09	21.08			0.02
C9	C3	unknown	IGF1	21.09	21.08			0.02
C10	C4	unknown	IGF1	16.45	16.55			0.25
C11	C4	unknown	IGF1	16.36	16.55			0.25
C12	C4	unknown	IGF1	16.83	16.55			0.25
D1	IUA1	unknown	IGF1	25.39	25.65			0.3
D2	IUA1	unknown	IGF1	25.59	25.65			0.3
D3	IUA1	unknown	IGF1	25.98	25.65			0.3
D4	IUA2	unknown	IGF1	20.04	19.89			0.13
D5	IUA2	unknown	IGF1	19.85	19.89			0.13
D6	IUA2	unknown	IGF1	19.79	19.89			0.13
D7	IUA3	unknown	IGF1	22.36	22.47			0.1
D8	IUA3	unknown	IGF1	22.53	22.47			0.1
D9	IUA3	unknown	IGF1	22.54	22.47			0.1
D10	IUA4	unknown	IGF1	18.67	18.59			0.1
D11	IUA4	unknown	IGF1	18.63	18.59			0.1
D12	IUA4	unknown	IGF1	18.48	18.59			0.1
E1	C1	unknown	WNT5A	20.48	20.28			0.18
E2	C1	unknown	WNT5A	20.22	20.28			0.18
E3	C1	unknown	WNT5A	20.14	20.28			0.18
E4	C2	unknown	WNT5A	23.84	24.01			0.15
E5	C2	unknown	WNT5A	24.13	24.01			0.15
E6	C2	unknown	WNT5A	24.06	24.01			0.15
E7	C3	unknown	WNT5A	21.96	21.97			0.05
E8	C3	unknown	WNT5A	21.93	21.97			0.05
E9	C3	unknown	WNT5A	22.02	21.97			0.05
E10	C4	unknown	WNT5A	19.53	19.46			0.15
E11	C4	unknown	WNT5A	19.57	19.46			0.15
E12	C4	unknown	WNT5A	19.29	19.46			0.15
F1	IUA1	unknown	WNT5A	23.3	23.31			0.05
F2	IUA1	unknown	WNT5A	23.26	23.31			0.05
F3	IUA1	unknown	WNT5A	23.36	23.31			0.05
F4	IUA2	unknown	WNT5A	23.46	23.54			0.11
F5	IUA2	unknown	WNT5A	23.5	23.54			0.11
F6	IUA2	unknown	WNT5A	23.66	23.54			0.11
F7	IUA3	unknown	WNT5A	22.93	22.82			0.28
F8	IUA3	unknown	WNT5A	22.5	22.82			0.28
F9	IUA3	unknown	WNT5A	23.03	22.82			0.28
F10	IUA4	unknown	WNT5A	20.42	20.37			0.62
F11	IUA4	unknown	WNT5A	20.97	20.37			0.62
F12	IUA4	unknown	WNT5A	19.73	20.37			0.62
