# Supplementary material for: Immune-related hub genes in intrauterine adhesions: a bioinformatics approach
Source: PeerJ journal article supplement (doi:10.7717/peerj.20035), 2025-10-03
Supplement: qPCR_original_data.zip [file IGF1+WNT5A+BIRC5 HUMAN2024-04-17.xlsx]

## Sheet: 2024-04-17 LFQ
Title:
Date/Time:	2024/4/17 12:09:35	2024/4/17 13:16:46
Device:	qTOWER3/G	3107B-3423513
Operator:
Comments:
Colors+Dyes:	Pos	Color Module	Dye	Gain	Meas	Refr
	1	Blue.470.520.11.3	SybrGreen	5	*
Heated Lid:	100°C
TC Protocol:	steps	scan	°C	m:s	goto	loops	delta Temp(°C)	delta Time (s)	ramp (°C/s
	1		95	00:30	0	0	0	0	8
	2		95	00:05	0	0	0	0	6
	3	*	60	00:30	2	39	0	0	6
	4	*	60	00:15	4	35	1	0	5
Melt active:	Yes
Meas. Repeats:	3
Color Comp.:
hole	sample name	sample type	gene	Ct	Ct average value			Ct SD
G1	N1	unknown	BIRC5	21.07	21.11			0.04
G2	N1	unknown	BIRC5	21.13	21.11			0.04
G3	N1	unknown	BIRC5	21.14	21.11			0.04
G4	N2	unknown	BIRC5	26.21	25.89			0.31
G5	N2	unknown	BIRC5	25.6	25.89			0.31
G6	N2	unknown	BIRC5	25.86	25.89			0.31
G7	N3	unknown	BIRC5	25.6	25.77			0.21
G8	N3	unknown	BIRC5	26	25.77			0.21
G9	N3	unknown	BIRC5	25.72	25.77			0.21
G10	N4	unknown	BIRC5	20.05	20.14			0.08
G11	N4	unknown	BIRC5	20.2	20.14			0.08
G12	N4	unknown	BIRC5	20.16	20.14			0.08
H1	IUA1	unknown	BIRC5	19.83	19.84			0.05
H2	IUA1	unknown	BIRC5	19.79	19.84			0.05
H3	IUA1	unknown	BIRC5	19.89	19.84			0.05
H4	IUA2	unknown	BIRC5	24.18	24.11			0.09
H5	IUA2	unknown	BIRC5	24.14	24.11			0.09
H6	IUA2	unknown	BIRC5	24.01	24.11			0.09
H7	IUA3	unknown	BIRC5	21.07	21.08			0.06
H8	IUA3	unknown	BIRC5	21.03	21.08			0.06
H9	IUA3	unknown	BIRC5	21.15	21.08			0.06
H10	IUA4	unknown	BIRC5	21.19	21.21			0.02
H11	IUA4	unknown	BIRC5	21.22	21.21			0.02
H12	IUA4	unknown	BIRC5	21.22	21.21			0.02
A1	N1	unknown	GAPDH	16.75	16.73			0.05
A2	N1	unknown	GAPDH	16.77	16.73			0.05
A3	N1	unknown	GAPDH	16.67	16.73			0.05
A4	N2	unknown	GAPDH	19.89	19.94			0.07
A5	N2	unknown	GAPDH	19.9	19.94			0.07
A6	N2	unknown	GAPDH	20.02	19.94			0.07
A7	N3	unknown	GAPDH	20.35	20.37			0.02
A8	N3	unknown	GAPDH	20.4	20.37			0.02
A9	N3	unknown	GAPDH	20.36	20.37			0.02
A10	N4	unknown	GAPDH	15.23	15.3			0.07
A11	N4	unknown	GAPDH	15.38	15.3			0.07
A12	N4	unknown	GAPDH	15.28	15.3			0.07
B1	IUA1	unknown	GAPDH	15.11	15.05			0.05
B2	IUA1	unknown	GAPDH	15.03	15.05			0.05
B3	IUA1	unknown	GAPDH	15.01	15.05			0.05
B4	IUA2	unknown	GAPDH	19.2	19.21			0.1
B5	IUA2	unknown	GAPDH	19.11	19.21			0.1
B6	IUA2	unknown	GAPDH	19.32	19.21			0.1
B7	IUA3	unknown	GAPDH	16.21	16.14			0.07
B8	IUA3	unknown	GAPDH	16.13	16.14			0.07
B9	IUA3	unknown	GAPDH	16.07	16.14			0.07
B10	IUA4	unknown	GAPDH	15.79	15.88			0.08
B11	IUA4	unknown	GAPDH	15.93	15.88			0.08
B12	IUA4	unknown	GAPDH	15.92	15.88			0.08
E1	N1	unknown	IGF1	16.32	16.39			0.06
E2	N1	unknown	IGF1	16.42	16.39			0.06
E3	N1	unknown	IGF1	16.43	16.39			0.06
E4	N2	unknown	IGF1	20.43	20.37			0.09
E5	N2	unknown	IGF1	20.27	20.37			0.09
E6	N2	unknown	IGF1	20.42	20.37			0.09
E7	N3	unknown	IGF1	20.32	20.23			0.07
E8	N3	unknown	IGF1	20.21	20.23			0.07
E9	N3	unknown	IGF1	20.17	20.23			0.07
E10	N4	unknown	IGF1	15.1	15.19			0.08
E11	N4	unknown	IGF1	15.22	15.19			0.08
E12	N4	unknown	IGF1	15.25	15.19			0.08
F1	IUA1	unknown	IGF1	15.35	15.33			0.09
F2	IUA1	unknown	IGF1	15.23	15.33			0.09
F3	IUA1	unknown	IGF1	15.41	15.33			0.09
F4	IUA2	unknown	IGF1	22.98	22.91			0.11
F5	IUA2	unknown	IGF1	22.96	22.91			0.11
F6	IUA2	unknown	IGF1	22.79	22.91			0.11
F7	IUA3	unknown	IGF1	15.28	15.39			0.11
F8	IUA3	unknown	IGF1	15.41	15.39			0.11
F9	IUA3	unknown	IGF1	15.49	15.39			0.11
F10	IUA4	unknown	IGF1	15.18	15.26			0.11
F11	IUA4	unknown	IGF1	15.39	15.26			0.11
F12	IUA4	unknown	IGF1	15.22	15.26			0.11
C1	N1	unknown	WNT5A	19.29	19.29			0.09
C2	N1	unknown	WNT5A	19.38	19.29			0.09
C3	N1	unknown	WNT5A	19.19	19.29			0.09
C4	N2	unknown	WNT5A	23.36	23.43			0.08
C5	N2	unknown	WNT5A	23.4	23.43			0.08
C6	N2	unknown	WNT5A	23.52	23.43			0.08
C7	N3	unknown	WNT5A	22.37	22.32			0.07
C8	N3	unknown	WNT5A	22.35	22.32			0.07
C9	N3	unknown	WNT5A	22.25	22.32			0.07
C10	N4	unknown	WNT5A	19.05	19.07			0.05
C11	N4	unknown	WNT5A	19.04	19.07			0.05
C12	N4	unknown	WNT5A	19.13	19.07			0.05
D1	IUA1	unknown	WNT5A	18.21	18.15			0.07
D2	IUA1	unknown	WNT5A	18.16	18.15			0.07
D3	IUA1	unknown	WNT5A	18.08	18.15			0.07
D4	IUA2	unknown	WNT5A	25.49	25.43			0.11
D5	IUA2	unknown	WNT5A	25.3	25.43			0.11
D6	IUA2	unknown	WNT5A	25.5	25.43			0.11
D7	IUA3	unknown	WNT5A	19.5	19.4			0.09
D8	IUA3	unknown	WNT5A	19.34	19.4			0.09
D9	IUA3	unknown	WNT5A	19.36	19.4			0.09
D10	IUA4	unknown	WNT5A	19.04	19.07			0.05
D11	IUA4	unknown	WNT5A	19.04	19.07			0.05
D12	IUA4	unknown	WNT5A	19.13	19.07			0.05
