# Supplementary material for: Immune-related hub genes in intrauterine adhesions: a bioinformatics approach
Source: PeerJ journal article supplement (doi:10.7717/peerj.20035), 2025-10-03
Supplement: qPCR_original_data.zip [file IGF1+WNT5A+BIRC5 MICE 2024-4-18.xlsx]

## Sheet: IGF1+WNT5A+BIRC5 MICE 2024-4-18
Title:
Date/Time:	2024/4/18 16:11:05	2024/4/18 17:18:22
Device:	qTOWER3/G	3107B-3423513
Operator:
Comments:
Colors+Dyes:	Pos	Color Module	Dye	Gain	Meas	Refr
	1	Blue.470.520.11.3	SybrGreen	5	*
Heated Lid:	100°C
TC Protocol:	steps	scan	°C	m:s	goto	loops	delta Temp(°C)	delta Time (s)	ramp (°C/s
	1		95	00:30	0	0	0	0	8
	2		95	00:05	0	0	0	0	6
	3	*	60	00:30	2	39	0	0	6
	4	*	60	00:15	4	35	1	0	5
Melt active:	Yes
Meas. Repeats:	3
Color Comp.:
hole	sample name	sample type	gene	Ct	Ct average value			Ct SD
E1	C1	unknown	BIRCS	19.62	19.71			0.11
E2	C1	unknown	BIRCS	19.84	19.71			0.11
E3	C1	unknown	BIRCS	19.67	19.71			0.11
E4	C2	unknown	BIRCS	20.3	20.31			0.1
E5	C2	unknown	BIRCS	20.22	20.31			0.1
E6	C2	unknown	BIRCS	20.42	20.31			0.1
E7	C3	unknown	BIRCS	25.65	25.61			0.23
E8	C3	unknown	BIRCS	25.36	25.61			0.23
E9	C3	unknown	BIRCS	25.81	25.61			0.23
E10	C4	unknown	BIRCS	31.03	29.4			1.65
E11	C4	unknown	BIRCS	27.73	29.4			1.65
E12	C4	unknown	BIRCS	29.43	29.4			1.65
F1	IUA1	unknown	BIRCS	26.8	26.6			0.22
F2	IUA1	unknown	BIRCS	26.64	26.6			0.22
F3	IUA1	unknown	BIRCS	26.37	26.6			0.22
F4	IUA2	unknown	BIRCS	22.62	23.19			1.75
F5	IUA2	unknown	BIRCS	26.7	23.19			1.75
F6	IUA2	unknown	BIRCS	21.85	23.19			1.75
F7	IUA2	unknown	BIRCS	22.58	23.19			1.75
F8	IUA2	unknown	BIRCS	22.69	23.19			1.75
F9	IUA2	unknown	BIRCS	22.7	23.19			1.75
F10	IUA3	unknown	BIRCS	21.22	21.27			0.04
F11	IUA3	unknown	BIRCS	21.29	21.27			0.04
F12	IUA3	unknown	BIRCS	21.29	21.27			0.04
A1	C1	unknown	GADPH	14.55	14.41			0.22
A2	C1	unknown	GADPH	14.15	14.41			0.22
A3	C1	unknown	GADPH	14.53	14.41			0.22
A4	C2	unknown	GADPH	14.09	14.03			0.28
A5	C2	unknown	GADPH	13.74	14.03			0.28
A6	C2	unknown	GADPH	14.28	14.03			0.28
A7	C3	unknown	GADPH	21.57	21.18			0.36
A8	C3	unknown	GADPH	20.88	21.18			0.36
A9	C3	unknown	GADPH	21.09	21.18			0.36
A10	C4	unknown	GADPH	21.64	21.54			0.09
A11	C4	unknown	GADPH	21.5	21.54			0.09
A12	C4	unknown	GADPH	21.47	21.54			0.09
B1	IUA1	unknown	GADPH	24.04	24.16			0.15
B2	IUA1	unknown	GADPH	24.33	24.16			0.15
B3	IUA1	unknown	GADPH	24.11	24.16			0.15
B4	IUA2	unknown	GADPH	14.16	14.02			0.4
B5	IUA2	unknown	GADPH	14.08	14.02			0.4
B6	IUA2	unknown	GADPH	13.22	14.02			0.4
B7	IUA2	unknown	GADPH	14.14	14.02			0.4
B8	IUA2	unknown	GADPH	14.29	14.02			0.4
B9	IUA2	unknown	GADPH	14.21	14.02			0.4
B10	IUA3	unknown	GADPH	13.71	13.67			0.25
B11	IUA3	unknown	GADPH	13.9	13.67			0.25
B12	IUA3	unknown	GADPH	13.4	13.67			0.25
G1	C1	unknown	IGF1	19.3	19.27			0.06
G2	C1	unknown	IGF1	19.19	19.27			0.06
G3	C1	unknown	IGF1	19.3	19.27			0.06
G4	C2	unknown	IGF1	18.06	18.04			0.03
G5	C2	unknown	IGF1	18.01	18.04			0.03
G6	C2	unknown	IGF1	18.04	18.04			0.03
G7	C3	unknown	IGF1	25.01	25.04			0.08
G8	C3	unknown	IGF1	24.98	25.04			0.08
G9	C3	unknown	IGF1	25.13	25.04			0.08
G10	C4	unknown	IGF1	26.64	26.54			0.11
G11	C4	unknown	IGF1	26.42	26.54			0.11
G12	C4	unknown	IGF1	26.57	26.54			0.11
H1	IUA1	unknown	IGF1	27.26	27.26			0.09
H2	IUA1	unknown	IGF1	27.17	27.26			0.09
H3	IUA1	unknown	IGF1	27.36	27.26			0.09
H4	IUA2	unknown	IGF1	20.01	19.87			0.13
H5	IUA2	unknown	IGF1	19.78	19.87			0.13
H6	IUA2	unknown	IGF1	19.88	19.87			0.13
H7	IUA2	unknown	IGF1	19.78	19.87			0.13
H8	IUA2	unknown	IGF1	19.72	19.87			0.13
H9	IUA2	unknown	IGF1	20.04	19.87			0.13
H10	IUA3	unknown	IGF1	19.39	19.58			0.22
H11	IUA3	unknown	IGF1	19.54	19.58			0.22
H12	IUA3	unknown	IGF1	19.83	19.58			0.22
C1	C1	unknown	WNT5A	19.25	19.12			0.12
C2	C1	unknown	WNT5A	19.02	19.12			0.12
C3	C1	unknown	WNT5A	19.09	19.12			0.12
C4	C2	unknown	WNT5A	17.31	17.31			0.21
C5	C2	unknown	WNT5A	17.1	17.31			0.21
C6	C2	unknown	WNT5A	17.52	17.31			0.21
C7	C3	unknown	WNT5A	25	25.03			0.14
C8	C3	unknown	WNT5A	24.92	25.03			0.14
C9	C3	unknown	WNT5A	25.19	25.03			0.14
C10	C4	unknown	WNT5A	29.9	30.89			1.2
C11	C4	unknown	WNT5A	30.53	30.89			1.2
C12	C4	unknown	WNT5A	32.23	30.89			1.2
D1	IUA1	unknown	WNT5A	28	28.06			0.13
D2	IUA1	unknown	WNT5A	28.2	28.06			0.13
D3	IUA1	unknown	WNT5A	27.97	28.06			0.13
D4	IUA2	unknown	WNT5A	20.99	20.93			0.12
D5	IUA2	unknown	WNT5A	20.7	20.93			0.12
D6	IUA2	unknown	WNT5A	20.98	20.93			0.12
D7	IUA2	unknown	WNT5A	20.99	20.93			0.12
D8	IUA2	unknown	WNT5A	20.9	20.93			0.12
D9	IUA2	unknown	WNT5A	21.03	20.93			0.12
D10	IUA3	unknown	WNT5A	19.8	19.69			0.15
D11	IUA3	unknown	WNT5A	19.75	19.69			0.15
D12	IUA3	unknown	WNT5A	19.52	19.69			0.15
