# Supplementary material for: Immune-related hub genes in intrauterine adhesions: a bioinformatics approach
Source: PeerJ journal article supplement (doi:10.7717/peerj.20035), 2025-10-03
Supplement: qPCR_original_data.zip [file TUBB3+GDF7+PTGDS MICE 2024-06-12.xlsx]

## Sheet: TUBB3+GDF7+PTGDS MICE 2024-06-1
Title:
Date/Time:	2024/6/12 12:43:15	2024/6/12 13:50:37
Device:	qTOWER3/G	3107B-3423513
Operator:
Comments:
Colors+Dyes:	Pos	Color Module	Dye	Gain	Meas	Refr
	1	Blue.470.520.11.3	SybrGreen	5	*
Heated Lid:	100°C
TC Protocol:	steps	scan	°C	m:s	goto	loops	delta Temp(°C)	delta Time (s)	ramp (°C/s
	1		95	00:30	0	0	0	0	8
	2		95	00:05	0	0	0	0	6
	3	*	60	00:30	2	39	0	0	6
	4	*	60	00:15	4	35	1	0	5
Melt active:	Yes
Meas. Repeats:	3
Color Comp.:
hole	sample name	sample type	gene	Ct	Ct average value			Ct SD
E12	C4	unknown	GDF7	33.4	32.69			0.67
E9	C3	unknown	GDF7	32.91	32.42			0.42
E11	C4	unknown	GDF7	32.6	32.69			0.67
G8	C3	unknown	PTGDS	32.47	32.47			0
H1	IUA1	unknown	PTGDS	32.43	31.96			0.67
G12	C4	unknown	PTGDS	32.3	32.3			0
E8	C3	unknown	GDF7	32.22	32.42			0.42
E7	C3	unknown	GDF7	32.14	32.42			0.42
C11	C4	unknown	TUBB3	32.09	30.79			1.13
E10	C4	unknown	GDF7	32.07	32.69			0.67
F11	IUA4	unknown	GDF7	32.03	31.8			0.26
C7	C3	unknown	TUBB3	31.88	29.82			1.89
F12	IUA4	unknown	GDF7	31.87	31.8			0.26
F10	IUA4	unknown	GDF7	31.52	31.8			0.26
H2	IUA1	unknown	PTGDS	31.48	31.96			0.67
D1	IUA1	unknown	TUBB3	30.41	29.76			0.85
C12	C4	unknown	TUBB3	30.16	30.79			1.13
C10	C4	unknown	TUBB3	30.11	30.79			1.13
D3	IUA1	unknown	TUBB3	30.08	29.76			0.85
D4	IUA2	unknown	TUBB3	29.67	29.23			0.39
H12	IUA4	unknown	PTGDS	29.56	29.12			0.42
C8	C3	unknown	TUBB3	29.41	29.82			1.89
D12	IUA4	unknown	TUBB3	29.2	28.73			0.42
H11	IUA4	unknown	PTGDS	29.07	29.12			0.42
D6	IUA2	unknown	TUBB3	29.06	29.23			0.39
F1	IUA1	unknown	GDF7	29.06	28.83			0.19
D5	IUA2	unknown	TUBB3	28.95	29.23			0.39
D2	IUA1	unknown	TUBB3	28.8	29.76			0.85
F3	IUA1	unknown	GDF7	28.73	28.83			0.19
F2	IUA1	unknown	GDF7	28.72	28.83			0.19
H10	IUA4	unknown	PTGDS	28.72	29.12			0.42
D11	IUA4	unknown	TUBB3	28.63	28.73			0.42
D10	IUA4	unknown	TUBB3	28.37	28.73			0.42
C5	C2	unknown	TUBB3	28.3	27.75			0.48
C9	C3	unknown	TUBB3	28.17	29.82			1.89
C2	C1	unknown	TUBB3	27.8	27.32			0.49
C6	C2	unknown	TUBB3	27.57	27.75			0.48
C4	C2	unknown	TUBB3	27.4	27.75			0.48
C1	C1	unknown	TUBB3	27.34	27.32			0.49
H6	IUA2	unknown	PTGDS	27.27	27.12			0.14
H4	IUA2	unknown	PTGDS	27.06	27.12			0.14
H5	IUA2	unknown	PTGDS	27.01	27.12			0.14
C3	C1	unknown	TUBB3	26.82	27.32			0.49
D9	IUA3	unknown	TUBB3	26.27	26.04			0.25
D8	IUA3	unknown	TUBB3	26.07	26.04			0.25
H8	IUA3	unknown	PTGDS	25.93	25.87			0.07
H7	IUA3	unknown	PTGDS	25.9	25.87			0.07
H9	IUA3	unknown	PTGDS	25.79	25.87			0.07
D7	IUA3	unknown	TUBB3	25.78	26.04			0.25
G2	C1	unknown	PTGDS	25.67	25.49			0.19
G3	C1	unknown	PTGDS	25.51	25.49			0.19
G1	C1	unknown	PTGDS	25.29	25.49			0.19
F5	IUA2	unknown	GDF7	24.7	24.51			0.16
F4	IUA2	unknown	GDF7	24.42	24.51			0.16
F6	IUA2	unknown	GDF7	24.41	24.51			0.16
F7	IUA3	unknown	GDF7	23.79	23.68			0.13
F9	IUA3	unknown	GDF7	23.7	23.68			0.13
G4	C2	unknown	PTGDS	23.62	23.46			0.2
F8	IUA3	unknown	GDF7	23.54	23.68			0.13
G6	C2	unknown	PTGDS	23.51	23.46			0.2
A8	C3	unknown	GAPDH	23.46	22.74			0.62
G5	C2	unknown	PTGDS	23.24	23.46			0.2
A12	C4	unknown	GAPDH	22.65	22.45			0.17
A7	C3	unknown	GAPDH	22.41	22.74			0.62
A11	C4	unknown	GAPDH	22.37	22.45			0.17
A9	C3	unknown	GAPDH	22.36	22.74			0.62
A10	C4	unknown	GAPDH	22.33	22.45			0.17
E3	C1	unknown	GDF7	21.75	21.4			0.31
E1	C1	unknown	GDF7	21.3	21.4			0.31
E2	C1	unknown	GDF7	21.15	21.4			0.31
B11	IUA4	unknown	GAPDH	20.6	19.52			0.94
B1	IUA1	unknown	GAPDH	20.01	19.46			0.48
E5	C2	unknown	GDF7	19.32	19.06			0.24
B2	IUA1	unknown	GAPDH	19.24	19.46			0.48
B3	IUA1	unknown	GAPDH	19.13	19.46			0.48
B10	IUA4	unknown	GAPDH	19.12	19.52			0.94
E4	C2	unknown	GDF7	19.02	19.06			0.24
B12	IUA4	unknown	GAPDH	18.84	19.52			0.94
E6	C2	unknown	GDF7	18.84	19.06			0.24
A1	C1	unknown	GAPDH	14.3	14.27			0.03
A2	C1	unknown	GAPDH	14.26	14.27			0.03
A3	C1	unknown	GAPDH	14.24	14.27			0.03
B4	IUA2	unknown	GAPDH	14.12	13.84			0.32
B5	IUA2	unknown	GAPDH	13.92	13.84			0.32
A5	C2	unknown	GAPDH	13.61	13.55			0.05
A6	C2	unknown	GAPDH	13.54	13.55			0.05
A4	C2	unknown	GAPDH	13.51	13.55			0.05
B6	IUA2	unknown	GAPDH	13.5	13.84			0.32
B9	IUA3	unknown	GAPDH	13.15	12.94			0.3
B7	IUA3	unknown	GAPDH	13.08	12.94			0.3
B8	IUA3	unknown	GAPDH	12.6	12.94			0.3
G7	C3	unknown	PTGDS	none
G9	C3	unknown	PTGDS	none
G10	C4	unknown	PTGDS	none
G11	C4	unknown	PTGDS	none
H3	IUA1	unknown	PTGDS	none
