# Supplementary material for: Immune-related hub genes in intrauterine adhesions: a bioinformatics approach
Source: PeerJ journal article supplement (doi:10.7717/peerj.20035), 2025-10-03
Supplement: qPCR_original_data.zip [file TUBB3+PTGDS+CCL14 MICE 2024-06-14.xlsx]

## Sheet: TUBB3+PTGDS+CCL14 MICE 2024-06-
Title:
Date/Time:	2024/6/14 14:30:51	2024/6/14 15:38:03
Device:	qTOWER3/G	3107B-3423513
Operator:
Comments:
Colors+Dyes:	Pos	Color Module	Dye	Gain	Meas	Refr
	1	Blue.470.520.11.3	SybrGreen	5	*
Heated Lid:	100°C
TC Protocol:	steps	scan	°C	m:s	goto	loops	delta Temp(°C)	delta Time (s)	ramp (°C/s
	1		95	00:30	0	0	0	0	8
	2		95	00:05	0	0	0	0	6
	3	*	60	00:30	2	39	0	0	6
	4	*	60	00:15	4	35	1	0	5
Melt active:	Yes
Meas. Repeats:	3
Color Comp.:
hole	sample name	sample type	gene	Ct	Ct average value			Ct SD
H4	IUA2	unknown	CCL14	34.77	33.63			1.27
H11	IUA4	unknown	CCL14	34.41	33.1			1.14
G4	C2	unknown	CCL14	34.22	33.53			0.63
H1	IUA1	unknown	CCL14	34.18	33.12			1.51
H6	IUA2	unknown	CCL14	33.85	33.63			1.27
G6	C2	unknown	CCL14	33.39	33.53			0.63
C9	C3	unknown	TUBB3	33.33	33.02			0.43
C12	C4	unknown	TUBB3	33.23	32.43			0.77
G5	C2	unknown	CCL14	32.98	33.53			0.63
C7	C3	unknown	TUBB3	32.72	33.02			0.43
G10	C4	unknown	CCL14	32.65	32.54			0.12
E8	C3	unknown	PTGDS	32.64	32.64			0
G12	C4	unknown	CCL14	32.55	32.54			0.12
D1	IUA1	unknown	TUBB3	32.53	31.15			1.36
G7	C3	unknown	CCL14	32.52	32.15			0.5
H10	IUA4	unknown	CCL14	32.48	33.1			1.14
G11	C4	unknown	CCL14	32.41	32.54			0.12
H12	IUA4	unknown	CCL14	32.41	33.1			1.14
G1	C1	unknown	CCL14	32.4	32.07			0.47
C10	C4	unknown	TUBB3	32.37	32.43			0.77
G9	C3	unknown	CCL14	32.35	32.15			0.5
F2	IUA1	unknown	PTGDS	32.33	32.29			0.05
F3	IUA1	unknown	PTGDS	32.26	32.29			0.05
H5	IUA2	unknown	CCL14	32.26	33.63			1.27
H3	IUA1	unknown	CCL14	32.05	33.12			1.51
H8	IUA3	unknown	CCL14	31.83	31.83			0
G2	C1	unknown	CCL14	31.75	32.07			0.47
C11	C4	unknown	TUBB3	31.69	32.43			0.77
G8	C3	unknown	CCL14	31.59	32.15			0.5
D3	IUA1	unknown	TUBB3	31.12	31.15			1.36
D11	IUA4	unknown	TUBB3	31.08	30.32			0.67
F10	IUA4	unknown	PTGDS	30.4	30.24			0.17
F11	IUA4	unknown	PTGDS	30.26	30.24			0.17
D4	IUA2	unknown	TUBB3	30.08	29.61			0.75
D10	IUA4	unknown	TUBB3	30.08	30.32			0.67
F12	IUA4	unknown	PTGDS	30.06	30.24			0.17
D6	IUA2	unknown	TUBB3	29.99	29.61			0.75
D2	IUA1	unknown	TUBB3	29.82	31.15			1.36
D12	IUA4	unknown	TUBB3	29.81	30.32			0.67
C6	C2	unknown	TUBB3	29.15	28.88			0.31
C4	C2	unknown	TUBB3	28.93	28.88			0.31
D5	IUA2	unknown	TUBB3	28.75	29.61			0.75
C5	C2	unknown	TUBB3	28.55	28.88			0.31
C1	C1	unknown	TUBB3	27.81	27.76			0.04
C2	C1	unknown	TUBB3	27.74	27.76			0.04
C3	C1	unknown	TUBB3	27.74	27.76			0.04
F5	IUA2	unknown	PTGDS	27.66	27.48			0.21
F6	IUA2	unknown	PTGDS	27.54	27.48			0.21
F4	IUA2	unknown	PTGDS	27.25	27.48			0.21
D7	IUA3	unknown	TUBB3	27.03	26.86			0.27
D8	IUA3	unknown	TUBB3	27.01	26.86			0.27
D9	IUA3	unknown	TUBB3	26.55	26.86			0.27
F8	IUA3	unknown	PTGDS	26.39	26.24			0.15
E3	C1	unknown	PTGDS	26.23	25.99			0.21
F7	IUA3	unknown	PTGDS	26.22	26.24			0.15
F9	IUA3	unknown	PTGDS	26.1	26.24			0.15
E2	C1	unknown	PTGDS	25.92	25.99			0.21
E1	C1	unknown	PTGDS	25.83	25.99			0.21
E4	C2	unknown	PTGDS	24.17	24.08			0.11
E5	C2	unknown	PTGDS	24.09	24.08			0.11
E6	C2	unknown	PTGDS	23.96	24.08			0.11
A12	C4	unknown	GAPDH	23.04	22.95			0.13
A10	C4	unknown	GAPDH	23	22.95			0.13
A7	C3	unknown	GAPDH	22.99	22.89			0.12
A9	C3	unknown	GAPDH	22.93	22.89			0.12
A11	C4	unknown	GAPDH	22.81	22.95			0.13
A8	C3	unknown	GAPDH	22.76	22.89			0.12
B1	IUA1	unknown	GAPDH	20.42	20.38			0.05
B2	IUA1	unknown	GAPDH	20.4	20.38			0.05
B3	IUA1	unknown	GAPDH	20.32	20.38			0.05
B11	IUA4	unknown	GAPDH	19.94	19.69			0.23
B10	IUA4	unknown	GAPDH	19.64	19.69			0.23
B12	IUA4	unknown	GAPDH	19.5	19.69			0.23
A1	C1	unknown	GAPDH	14.84	14.73			0.13
B4	IUA2	unknown	GAPDH	14.84	14.55			0.33
A2	C1	unknown	GAPDH	14.76	14.73			0.13
B6	IUA2	unknown	GAPDH	14.63	14.55			0.33
A3	C1	unknown	GAPDH	14.59	14.73			0.13
A6	C2	unknown	GAPDH	14.58	14.27			0.27
B5	IUA2	unknown	GAPDH	14.19	14.55			0.33
A5	C2	unknown	GAPDH	14.15	14.27			0.27
A4	C2	unknown	GAPDH	14.08	14.27			0.27
B9	IUA3	unknown	GAPDH	13.64	13.53			0.11
B8	IUA3	unknown	GAPDH	13.52	13.53			0.11
B7	IUA3	unknown	GAPDH	13.42	13.53			0.11
C8	C3	unknown	TUBB3	none
E7	C3	unknown	PTGDS	none
E9	C3	unknown	PTGDS	none
E10	C4	unknown	PTGDS	none
E11	C4	unknown	PTGDS	none
E12	C4	unknown	PTGDS	none
F1	IUA1	unknown	PTGDS	none
G3	C1	unknown	CCL14	none
H2	IUA1	unknown	CCL14	none
H7	IUA3	unknown	CCL14	none
H9	IUA3	unknown	CCL14	none
