# Supplementary material for: Immune-related hub genes in intrauterine adhesions: a bioinformatics approach
Source: PeerJ journal article supplement (doi:10.7717/peerj.20035), 2025-10-03
Supplement: qPCR_original_data.zip [file TUBB3+PTGDS+CCL14 MICE 2024-06-19.xlsx]

## Sheet: TUBB3+PTGDS+CCL14 MICE 2024-06-
Title:
Date/Time:	2024/6/19 13:57:55	2024/6/19 15:04:53
Device:	qTOWER3/G	3107B-3423513
Operator:
Comments:
Colors+Dyes:	Pos	Color Module	Dye	Gain	Meas	Refr
	1	Blue.470.520.11.3	SybrGreen	5	*
Heated Lid:	100°C
TC Protocol:	steps	scan	°C	m:s	goto	loops	delta Temp(°C)	delta Time (s)	ramp (°C/s
	1		95	00:30	0	0	0	0	8
	2		95	00:05	0	0	0	0	6
	3	*	60	00:30	2	39	0	0	6
	4	*	60	00:15	4	35	1	0	5
Melt active:	Yes
Meas. Repeats:	3
Color Comp.:
hole	sample name	sample type	gene	Ct	Ct average value			Ct SD
G12	C4	unknown	CCL14	37.89	36.04			2.62
G9	C3	unknown	CCL14	35.35	34.51			0.75
H12	IUA4	unknown	CCL14	34.51	34.51			0
H6	IUA2	unknown	CCL14	34.46	34.46			0
G8	C3	unknown	CCL14	34.26	34.51			0.75
G11	C4	unknown	CCL14	34.18	36.04			2.62
H8	IUA3	unknown	CCL14	34.04	34.04			0
G7	C3	unknown	CCL14	33.91	34.51			0.75
C9	C3	unknown	TUBB3	33.84	33.84			0
C10	C4	unknown	TUBB3	33.5	33.5			0
G5	C2	unknown	CCL14	33.19	33.19			0
E4	C2	unknown	PTGDS	33.11	31.83			1.12
E10	C4	unknown	PTGDS	33.11	32.13			0.88
C4	C2	unknown	TUBB3	32.74	32.74			0
F2	IUA1	unknown	PTGDS	32.54	32.43			0.16
F3	IUA1	unknown	PTGDS	32.31	32.43			0.16
E12	C4	unknown	PTGDS	31.88	32.13			0.88
D3	IUA1	unknown	TUBB3	31.66	31.04			0.65
E11	C4	unknown	PTGDS	31.4	32.13			0.88
E5	C2	unknown	PTGDS	31.33	31.83			1.12
D11	IUA4	unknown	TUBB3	31.2	30.12			0.97
D2	IUA1	unknown	TUBB3	31.12	31.04			0.65
E7	C3	unknown	PTGDS	31.07	30.82			0.22
E6	C2	unknown	PTGDS	31.06	31.83			1.12
E9	C3	unknown	PTGDS	30.76	30.82			0.22
E8	C3	unknown	PTGDS	30.64	30.82			0.22
D1	IUA1	unknown	TUBB3	30.36	31.04			0.65
F11	IUA4	unknown	PTGDS	30.36	30.1			0.33
F12	IUA4	unknown	PTGDS	30.22	30.1			0.33
D12	IUA4	unknown	TUBB3	29.82	30.12			0.97
F10	IUA4	unknown	PTGDS	29.73	30.1			0.33
C3	C1	unknown	TUBB3	29.33	28.93			0.35
D10	IUA4	unknown	TUBB3	29.32	30.12			0.97
D6	IUA2	unknown	TUBB3	29.06	28.92			0.24
D4	IUA2	unknown	TUBB3	29.05	28.92			0.24
C2	C1	unknown	TUBB3	28.78	28.93			0.35
C1	C1	unknown	TUBB3	28.68	28.93			0.35
D5	IUA2	unknown	TUBB3	28.64	28.92			0.24
F6	IUA2	unknown	PTGDS	27.19	27.03			0.19
F5	IUA2	unknown	PTGDS	27.08	27.03			0.19
D9	IUA3	unknown	TUBB3	26.82	26.55			0.24
F4	IUA2	unknown	PTGDS	26.82	27.03			0.19
G3	C1	unknown	CCL14	26.6	26.6			0
D8	IUA3	unknown	TUBB3	26.46	26.55			0.24
D7	IUA3	unknown	TUBB3	26.36	26.55			0.24
F9	IUA3	unknown	PTGDS	26.07	25.85			0.35
F7	IUA3	unknown	PTGDS	26.03	25.85			0.35
F8	IUA3	unknown	PTGDS	25.44	25.85			0.35
E1	C1	unknown	PTGDS	23.58	23.56			0.02
E2	C1	unknown	PTGDS	23.56	23.56			0.02
E3	C1	unknown	PTGDS	23.54	23.56			0.02
B12	IUA4	unknown	GAPDH	19.77	19.58			0.18
A12	C4	unknown	GAPDH	19.73	19.59			0.14
A11	C4	unknown	GAPDH	19.6	19.59			0.14
B11	IUA4	unknown	GAPDH	19.56	19.58			0.18
A10	C4	unknown	GAPDH	19.45	19.59			0.14
B10	IUA4	unknown	GAPDH	19.42	19.58			0.18
B3	IUA1	unknown	GAPDH	19.25	19.03			0.24
A5	C2	unknown	GAPDH	19.1	19.01			0.15
A6	C2	unknown	GAPDH	19.09	19.01			0.15
B1	IUA1	unknown	GAPDH	19.07	19.03			0.24
A9	C3	unknown	GAPDH	19.03	18.85			0.16
A4	C2	unknown	GAPDH	18.84	19.01			0.15
A8	C3	unknown	GAPDH	18.81	18.85			0.16
B2	IUA1	unknown	GAPDH	18.78	19.03			0.24
A7	C3	unknown	GAPDH	18.73	18.85			0.16
B5	IUA2	unknown	GAPDH	14.12	14.07			0.06
B4	IUA2	unknown	GAPDH	14.08	14.07			0.06
B6	IUA2	unknown	GAPDH	14	14.07			0.06
A1	C1	unknown	GAPDH	13.82	13.68			0.16
A2	C1	unknown	GAPDH	13.72	13.68			0.16
A3	C1	unknown	GAPDH	13.51	13.68			0.16
B9	IUA3	unknown	GAPDH	13.14	13.02			0.12
B8	IUA3	unknown	GAPDH	13.02	13.02			0.12
B7	IUA3	unknown	GAPDH	12.89	13.02			0.12
C5	C2	unknown	TUBB3	none
C6	C2	unknown	TUBB3	none
C7	C3	unknown	TUBB3	none
C8	C3	unknown	TUBB3	none
C11	C4	unknown	TUBB3	none
C12	C4	unknown	TUBB3	none
F1	IUA1	unknown	PTGDS	none
G1	C1	unknown	CCL14	none
G2	C1	unknown	CCL14	none
G4	C2	unknown	CCL14	none
G6	C2	unknown	CCL14	none
G10	C4	unknown	CCL14	none
H1	IUA1	unknown	CCL14	none
H2	IUA1	unknown	CCL14	none
H3	IUA1	unknown	CCL14	none
H4	IUA2	unknown	CCL14	none
H5	IUA2	unknown	CCL14	none
H7	IUA3	unknown	CCL14	none
H9	IUA3	unknown	CCL14	none
H10	IUA4	unknown	CCL14	none
H11	IUA4	unknown	CCL14	none
