# Supplementary material for: Immune-related hub genes in intrauterine adhesions: a bioinformatics approach
Source: PeerJ journal article supplement (doi:10.7717/peerj.20035), 2025-10-03
Supplement: qPCR_original_data.zip [file TUBB3+PTGDS+CCL14 MICE 2024.04.30.xlsx]

## Sheet: Sheet1
Title:
Date/Time:	45412.7	45412.7
Device:	qTOWER3/G	3107B-3423513
Operator:
Comments:
Colors+Dyes:	Pos	Color Module	Dye	Gain	Meas	Refr
	1	Blue.470.520.11.3	SybrGreen	5	*
Heated Lid:	100°C
TC Protocol:	steps	scan	°C	m:s	goto	loops	delta Temp(°C)	delta Time (s)	ramp (°C/s
	1		95	0.0208333	0	0	0	0	8
	2		95	0.00347222	0	0	0	0	6
	3	*	60	0.0208333	2	39	0	0	6
	4	*	60	0.0104167	4	35	1	0	5
Melt active:	Yes
Meas. Repeats:	3
Color Comp.:
hole	sample name	sample type	gene	Ct	Ct average value			Ct SD
A1	C1	unknown	GAPDH	14.57	14.51			0.06
A10	C4	unknown	GAPDH	23.28	23.09			0.16
A11	C4	unknown	GAPDH	23.03	23.09			0.16
A12	C4	unknown	GAPDH	22.97	23.09			0.16
A2	C1	unknown	GAPDH	14.5	14.51			0.06
A3	C1	unknown	GAPDH	14.45	14.51			0.06
A4	C2	unknown	GAPDH	19.29	16.16			2.72
A5	C2	unknown	GAPDH	14.58	16.16			2.72
A6	C2	unknown	GAPDH	14.6	16.16			2.72
A7	C3	unknown	GAPDH	14.43	14.26			0.18
A8	C3	unknown	GAPDH	14.08	14.26			0.18
A9	C3	unknown	GAPDH	14.26	14.26			0.18
B1	I1	unknown	GAPDH	12.97	12.75			0.19
B10	I4	unknown	GAPDH	13.7	13.7			0.01
B11	I4	unknown	GAPDH	13.71	13.7			0.01
B12	I4	unknown	GAPDH	13.69	13.7			0.01
B2	I1	unknown	GAPDH	12.65	12.75			0.19
B3	I1	unknown	GAPDH	12.64	12.75			0.19
B4	I2	unknown	GAPDH	20.22	19.88			0.31
B5	I2	unknown	GAPDH	19.78	19.88			0.31
B6	I2	unknown	GAPDH	19.63	19.88			0.31
B7	I3	unknown	GAPDH	17.05	17.01			0.15
B8	I3	unknown	GAPDH	16.84	17.01			0.15
B9	I3	unknown	GAPDH	17.13	17.01			0.15
C1	C1	unknown	TUBB3	26.6	26.93			0.29
C10	C4	unknown	TUBB3	31.13	32.17			1.48
C11	C4	unknown	TUBB3	无Ct
C12	C4	unknown	TUBB3	33.21	32.17			1.48
C2	C1	unknown	TUBB3	27.08	26.93			0.29
C3	C1	unknown	TUBB3	27.11	26.93			0.29
C4	C2	unknown	TUBB3	26.76	26.72			0.05
C5	C2	unknown	TUBB3	26.71	26.72			0.05
C6	C2	unknown	TUBB3	26.67	26.72			0.05
C7	C3	unknown	TUBB3	27.4	27.64			0.25
C8	C3	unknown	TUBB3	28.4	27.64			0.25
C9	C3	unknown	TUBB3	29.4	27.64			0.25
D1	I1	unknown	TUBB3	26.12	26.29			0.27
D10	I4	unknown	TUBB3	26.51	26.6			0.26
D11	I4	unknown	TUBB3	26.4	26.6			0.26
D12	I4	unknown	TUBB3	26.89	26.6			0.26
D2	I1	unknown	TUBB3	26.16	26.29			0.27
D3	I1	unknown	TUBB3	26.6	26.29			0.27
D4	I2	unknown	TUBB3	31.61	30.79			0.78
D5	I2	unknown	TUBB3	30.68	30.79			0.78
D6	I2	unknown	TUBB3	30.07	30.79			0.78
D7	I3	unknown	TUBB3	29.12	29.09			0.57
D8	I3	unknown	TUBB3	28.51	29.09			0.57
D9	I3	unknown	TUBB3	29.65	29.09			0.57
E1	C1	unknown	CCL14	none
E10	C4	unknown	CCL14	33.82	32.54			1.6
E11	C4	unknown	CCL14	33.04	32.54			1.6
E12	C4	unknown	CCL14	30.75	32.54			1.6
E2	C1	unknown	CCL14	31.7	31.62			0.11
E3	C1	unknown	CCL14	31.54	31.62			0.11
E4	C2	unknown	CCL14	none
E5	C2	unknown	CCL14	33.22	33.22			0.01
E6	C2	unknown	CCL14	33.23	33.22			0.01
E7	C3	unknown	CCL14	31.86	32.83			1.52
E8	C3	unknown	CCL14	32.05	32.83			1.52
E9	C3	unknown	CCL14	34.58	32.83			1.52
F1	I1	unknown	CCL14	31.71	31.4			0.92
F10	I4	unknown	CCL14	32.69	32.68			0.01
F11	I4	unknown	CCL14	32.68	32.68			0.01
F12	I4	unknown	CCL14	none
F2	I1	unknown	CCL14	30.36	31.4			0.92
F3	I1	unknown	CCL14	32.12	31.4			0.92
F4	I2	unknown	CCL14	33.18	33.43			0.51
F5	I2	unknown	CCL14	34.02	33.43			0.51
F6	I2	unknown	CCL14	33.09	33.43			0.51
F7	I3	unknown	CCL14	30.19	32.02			1.62
F8	I3	unknown	CCL14	33.27	32.02			1.62
F9	I3	unknown	CCL14	32.61	32.02			1.62
G1	C1	unknown	PTGDS	25.2	25.2			0.19
G10	C4	unknown	PTGDS	32.06	32.35			0.28
G11	C4	unknown	PTGDS	32.61	32.35			0.28
G12	C4	unknown	PTGDS	32.37	32.35			0.28
G2	C1	unknown	PTGDS	25.01	25.2			0.19
G3	C1	unknown	PTGDS	25.39	25.2			0.19
G4	C2	unknown	PTGDS	25.38	25.31			0.07
G5	C2	unknown	PTGDS	25.3	25.31			0.07
G6	C2	unknown	PTGDS	25.24	25.31			0.07
G7	C3	unknown	PTGDS	23.04	22.98			0.12
G8	C3	unknown	PTGDS	22.84	22.98			0.12
G9	C3	unknown	PTGDS	23.06	22.98			0.12
H1	I1	unknown	PTGDS	25.11	25.13			0.02
H10	I4	unknown	PTGDS	26.33	26.31			0.03
H11	I4	unknown	PTGDS	26.28	26.31			0.03
H12	I4	unknown	PTGDS	26.33	26.31			0.03
H2	I1	unknown	PTGDS	25.14	25.13			0.02
H3	I1	unknown	PTGDS	25.13	25.13			0.02
H4	I2	unknown	PTGDS	30.9	31.19			0.34
H5	I2	unknown	PTGDS	31.56	31.19			0.34
H6	I2	unknown	PTGDS	31.12	31.19			0.34
H7	I3	unknown	PTGDS	28.2	28.14			0.1
H8	I3	unknown	PTGDS	28.19	28.14			0.1
H9	I3	unknown	PTGDS	28.03	28.14			0.1
