# Supplementary material for: Immune-related hub genes in intrauterine adhesions: a bioinformatics approach
Source: PeerJ. 2025 Oct 3;13:e20035. doi: 10.7717/peerj.20035 (PMC12499562; doi:10.7717/peerj.20035)
Supplement: Supplemental Information 1 [file peerj-13-20035-s001.xlsx]

## Sheet: Sheet1
ITEM TO CHECK	IMPORTANCE	CHECKLIST
EXPERIMENTAL DESIGN
Definition of experimental and control groups	E	page5.line178-180,201-202
Number within each group	E	page5.line178-180,201-202
Assay carried out by core lab or investigator's lab?	D
Acknowledgement of authors' contributions	D
SAMPLE
Description	E	page5.line178-179
Volume/mass of sample processed	D
Microdissection or macrodissection	E	page5.line178-179
Processing procedure	E	page4.line157-158
If frozen - how and how quickly?	E	page4.line157-158
If fixed - with what, how quickly?	E	no fixed
Sample storage conditions and duration (especially for FFPE samples)	E	page5.line156-160
NUCLEIC ACID EXTRACTION
Procedure and/or instrumentation	E	page3.line125-126
Name of kit and details of any modifications	E	page3.line125-126
Source of additional reagents used	D
Details of DNase or RNAse treatment	E	page3-4.line126-127
Contamination assessment (DNA or RNA)	E	page4.line127-129
Nucleic acid quantification	E	page4.line127-129
Instrument and method	E	page4.line127-129
Purity (A260/A280)	D
Yield	D
RNA integrity method/instrument	E
RIN/RQI or Cq of 3' and 5' transcripts	E
Electrophoresis traces	D
Inhibition testing (Cq dilutions, spike or other)	E
REVERSE TRANSCRIPTION
Complete reaction conditions	E	page4.line139-146
Amount of RNA and reaction volume	E	page4.line139-142
Priming oligonucleotide (if using GSP) and concentration	E	page4.line139-142
Reverse transcriptase and concentration	E	page4.line139-142
Temperature and time	E	page4.line139-146
Manufacturer of reagents and catalogue numbers	D
Cqs with and without RT	D*
Storage conditions of cDNA	D
qPCR TARGET INFORMATION
If multiplex, efficiency and LOD of each assay.	E
Sequence accession number	E	page4.line147-149
Location of amplicon	D
Amplicon length	E
In silico specificity screen (BLAST, etc)	E
Pseudogenes, retropseudogenes or other homologs?	D
Sequence alignment	D
Secondary structure analysis of amplicon	D
Location of each primer by exon or intron (if applicable)	E
What splice variants are targeted?	E
qPCR OLIGONUCLEOTIDES
Primer sequences	E	page4.line147-149
RTPrimerDB Identification Number	D
Probe sequences	D**
Location and identity of any modifications	E
Manufacturer of oligonucleotides	D
Purification method	D
qPCR PROTOCOL
Complete reaction conditions	E	page4.line147-161
Reaction volume and amount of cDNA/DNA	E	page4.line155-158
Primer, (probe), Mg++ and dNTP concentrations	E	page4.line155-158
Polymerase identity and concentration	E	page4.line155-158
Buffer/kit identity and manufacturer	E	page4.line155-158
Exact chemical constitution of the buffer	D
Additives (SYBR Green I, DMSO, etc.)	E	page4.line155-158
Manufacturer of plates/tubes and catalog number	D
Complete thermocycling parameters	E	page4.line158-160
Reaction setup (manual/robotic)	D
Manufacturer of qPCR instrument	E	page4.line149-152
qPCR VALIDATION
Evidence of optimisation (from gradients)	D
Specificity (gel, sequence, melt, or digest)	E
For SYBR Green I, Cq of the NTC	E
Standard curves with slope and y-intercept	E
PCR efficiency calculated from slope	E
Confidence interval for PCR efficiency or standard error	D
r2 of standard curve	E
Linear dynamic range	E
Cq variation at lower limit	E
Confidence intervals throughout range	D
Evidence for limit of detection	E
If multiplex, efficiency and LOD of each assay.	E
DATA ANALYSIS
qPCR analysis program (source, version)	E
Cq method determination	E	page4.line162-164
Outlier identification and disposition	E	page4.line164-168
Results of NTCs	E
Justification of number and choice of reference genes	E	page4.line163-164
Description of normalisation method	E	page4.line168-170
Number and concordance of biological replicates	D
Number and stage (RT or qPCR) of technical replicates	E	page4.line153-155
Repeatability (intra-assay variation)	E	page4.line153-155
Reproducibility (inter-assay variation, %CV)	D
Power analysis	D
Statistical methods for result significance	E	page6.line253-256
Software (source, version)	E	page6.line253-256
Cq or raw data submission using RDML	D
Table 1. MIQE checklist for authors, reviewers and editors. All essential information (E) must be submitted with the manuscript. Desirable
information (D) should be submitted if available. If using primers obtained from RTPrimerDB, information on qPCR target, oligonucleotides,
protocols and validation is available from that source.
*: Assessing the absence of DNA using a no RT assay is essential when first extracting RNA. Once the sample has been validated as
RDNA-free, inclusion of a no-RT control is desirable, but no longer essential.
**: Disclosure of the probe sequence is highly desirable and strongly encouraged. However, since not all commercial pre-designed assay
vendors provide this information, it cannot be an essential requirement. Use of such assays is advised against.
