# Supplementary material for: Immune-related hub genes in intrauterine adhesions: a bioinformatics approach
Source: PeerJ. 2025 Oct 3;13:e20035. doi: 10.7717/peerj.20035 (PMC12499562; doi:10.7717/peerj.20035)
Supplement: Supplemental Information 3 [file peerj-13-20035-s003.xlsx]

## Sheet: IGF1 IHC RESULT
IGF1 IHC RESULTS
species	group	No.	Imagej%area	P-value
human	CON	1	10.708
		2	20.201
		3	16.781
		4	25.617
		5	37.002
huaman	IUA	1	8.618
		2	6.055
		3	6.421
		4	1.404
		5	8.272
		6	7.173
		7	2.726
		8	22.984
				P=0.0100
mice	IUA	1	12.082
		2	19.31
		3	12.815
		4	10.734
		5	19.4
mice	CON	1	26.337
		2	23.547
		3	23.733
		4	22.674
		5	19.173
				P=0.0056

## Sheet: WNT5A IHC RESULT
WNT5A IHC RESULTS
species	group	No.	Imagej%area	P-value
human	CON	1	23.756
		2	22.197
		3	14.266
		4	11.693
human	IUA	1	4.948
		2	7.986
		3	1.002
		4	17.087
		5	2.967
		6	3.439
		7	16.74
				P=0.0308
mice	IUA	1	15.388
		2	3.68
		3	10.253
		4	6.045
		5	16.241
mice	CON	1	23.433
		2	29.278
		3	22.918
		4	17.035
		5	24.087
				P=0.0033

## Sheet: BIRC5 IHC RESULT
BIRC5 IHC RESULTS
species	group	No.	Imagej%area	P-value
human	CON	1	7.819
		2	19.427
		3	3.179
		4	10.419
		5	24.402
human	IUA	1	3.722
		2	0.2
		3	0.052
		4	3.447
		5	0.086
		6	0.377
		7	1.24
				P=0.0051
mice	IUA	1	1.087
		2	3.555
		3	2.036
		4	2.162
		5	1.526
mice	CON	1	7.774
		2	4.716
		3	4.933
		4	6.218
		5	6.931
				P=0.0005

## Sheet: GDF7 IHC RESULT
GDF7 IHC RESULTS
species	group	No.	Imagej%area	P-value
human	CON	1	1.68
		2	4.013
		3	7.933
		4	3.224
		5	0.972
human	IUA	1	1.914
		2	1.056
		3	0.181
		4	0.986
		5	0.667
		6	0.579
		7	0.688
				P=0.0266
mice	IUA	1	0.868
		2	3.308
		3	1.747
		4	0.672
		5	3.835
mice	CON	1	4.518
		2	7.76
		3	4.192
		4	13.782
		5	11.848
				P=0.0141
